# Supplementary material for: A taxonomic outline of the Poecilimon affinis complex (Orthoptera) using the geometric morphometric approach
Source: PeerJ. 2021 Dec 22;9:e12668. doi: 10.7717/peerj.12668 (PMC8710050; doi:10.7717/peerj.12668)
Supplement: Supplemental Information 9 — Data on the position of a landmark of each specimen used in this study are included in the sheets (ovipositor, tegmen, cercus, pronotum) (LM- number of landmarks, IMAGE- the original name of the photo, ID-the name of the specimen used in this study). Data on the measurements of the stridulatory’s file, the number of teeth, the localities, and coordinates are included in the last sheet (stridulatory’s file). [file peerj-09-12668-s009.xlsx]

## Sheet: ovipositor
LM=9
528.00000 561.00000
425.00000 297.00000
1031.00000 593.00000
1179.00000 728.00000
1080.00000 460.00000
787.00000 503.00000
779.00000 340.00000
461.00000 500.00000
402.00000 400.00000
IMAGE=Paffaff_bratiya10o.tif
ID=affaffbra10
LM=9
436.00000 711.00000
382.00000 435.00000
1040.00000 648.00000
1178.00000 706.00000
1044.00000 481.00000
746.00000 588.00000
731.00000 424.00000
382.00000 646.00000
301.00000 550.00000
IMAGE=Paffaff_bratiya8o.tif
ID=affaffbra8
LM=9
501.00000 555.00000
369.00000 295.00000
1083.00000 572.00000
1217.00000 663.00000
1125.00000 422.00000
796.00000 483.00000
773.00000 305.00000
420.00000 500.00000
345.00000 399.00000
IMAGE=Paffaff_bratiya9o.tif
ID=affaffbra9
LM=9
378.00000 588.00000
291.00000 335.00000
992.00000 631.00000
1134.00000 743.00000
1051.00000 488.00000
720.00000 544.00000
727.00000 390.00000
272.00000 522.00000
225.00000 420.00000
IMAGE=Paffaff_osogovo10o.tif
ID=affaffoso10
LM=9
388.00000 664.00000
281.00000 416.00000
980.00000 770.00000
1144.00000 896.00000
1098.00000 706.00000
709.00000 667.00000
732.00000 515.00000
262.00000 592.00000
218.00000 500.00000
IMAGE=Paffaff_osogovo11o.tif
ID=affaffoso11
LM=9
426.00000 602.00000
346.00000 323.00000
1024.00000 639.00000
1191.00000 768.00000
1154.00000 542.00000
753.00000 548.00000
763.00000 390.00000
323.00000 511.00000
268.00000 410.00000
IMAGE=Paffaff_osogovo9o.tif
ID=affaffoso9
LM=9
397.00000 485.00000
299.00000 226.00000
998.00000 540.00000
1109.00000 618.00000
1018.00000 365.00000
711.00000 417.00000
675.00000 249.00000
317.00000 420.00000
249.00000 327.00000
IMAGE=Paffaff_rila10o.tif
ID=affaffril10
LM=9
488.00000 585.00000
468.00000 303.00000
995.00000 737.00000
1141.00000 899.00000
1114.00000 626.00000
797.00000 615.00000
814.00000 425.00000
447.00000 510.00000
410.00000 396.00000
IMAGE=Paffaff_rila1o.tif
ID=affaffril1
LM=9
339.00000 615.00000
283.00000 331.00000
867.00000 714.00000
1058.00000 877.00000
1003.00000 609.00000
641.00000 612.00000
675.00000 433.00000
271.00000 525.00000
222.00000 405.00000
IMAGE=Paffaff_rila2o.tif
ID=affaffril2
LM=9
506.00000 830.00000
347.00000 557.00000
1138.00000 721.00000
1289.00000 783.00000
1174.00000 564.00000
819.00000 692.00000
770.00000 516.00000
433.00000 782.00000
344.00000 686.00000
IMAGE=Paffaff_rila3o.tif
ID=affaffril3
LM=9
442.00000 724.00000
321.00000 468.00000
958.00000 617.00000
1177.00000 713.00000
1054.00000 479.00000
720.00000 590.00000
701.00000 423.00000
376.00000 676.00000
289.00000 596.00000
IMAGE=Paffaff_rila4o.tif
ID=affaffril4
LM=9
321.00000 723.00000
254.00000 400.00000
1130.00000 721.00000
1290.00000 813.00000
1137.00000 533.00000
742.00000 610.00000
745.00000 432.00000
260.00000 655.00000
174.00000 547.00000
IMAGE=Paffdin_mratinje1o.tif
ID=affdinmra1
LM=9
408.00000 726.00000
348.00000 465.00000
858.00000 711.00000
1002.00000 813.00000
955.00000 598.00000
637.00000 638.00000
648.00000 476.00000
343.00000 674.00000
274.00000 557.00000
IMAGE=Paffhaj_hajla7o.tif
ID=affhajhaj7
LM=9
470.00000 718.00000
392.00000 462.00000
981.00000 646.00000
1119.00000 741.00000
1055.00000 519.00000
751.00000 603.00000
743.00000 443.00000
401.00000 676.00000
316.00000 583.00000
IMAGE=Paffhaj_hajla8o.tif
ID=affhajhaj8
LM=9
226.00000 547.00000
212.00000 174.00000
977.00000 641.00000
1268.00000 914.00000
1165.00000 574.00000
654.00000 525.00000
730.00000 345.00000
166.00000 445.00000
126.00000 297.00000
IMAGE=Paffkom_luc2o.tif
ID=affkomluc2
LM=9
271.00000 594.00000
245.00000 222.00000
994.00000 796.00000
1210.00000 971.00000
1146.00000 677.00000
665.00000 622.00000
719.00000 429.00000
182.00000 453.00000
161.00000 310.00000
IMAGE=Paffkom_luc5o.tif
ID=affkomluc5
LM=9
281.00000 628.00000
231.00000 291.00000
944.00000 730.00000
1113.00000 645.00000
1212.00000 981.00000
669.00000 604.00000
715.00000 429.00000
209.00000 530.00000
171.00000 410.00000
IMAGE=Paffkom_luc6o.tif
ID=affkomluc6
LM=9
355.00000 841.00000
131.00000 597.00000
946.00000 731.00000
1187.00000 816.00000
1003.00000 566.00000
649.00000 719.00000
575.00000 537.00000
214.00000 787.00000
123.00000 700.00000
IMAGE=Paffrum_kolasin13o.tif
ID=affrumkol13
LM=9
356.00000 672.00000
222.00000 336.00000
1032.00000 634.00000
1268.00000 779.00000
1145.00000 493.00000
740.00000 576.00000
745.00000 379.00000
254.00000 584.00000
177.00000 457.00000
IMAGE=Paffrum_kolasin14o.tif
ID=affrumkol14
LM=9
370.00000 627.00000
302.00000 370.00000
881.00000 649.00000
1039.00000 753.00000
955.00000 529.00000
643.00000 573.00000
639.00000 410.00000
325.00000 565.00000
258.00000 462.00000
IMAGE=Paffser_ljuboten11o.tif
ID=affserlju11
LM=9
469.00000 768.00000
322.00000 536.00000
1009.00000 654.00000
1201.00000 732.00000
1085.00000 523.00000
736.00000 637.00000
705.00000 475.00000
367.00000 735.00000
280.00000 649.00000
IMAGE=Paffser_ljuboten12o.tif
ID=affserlju12
LM=9
371.00000 684.00000
315.00000 429.00000
861.00000 722.00000
1009.00000 858.00000
946.00000 590.00000
625.00000 625.00000
639.00000 464.00000
290.00000 627.00000
224.00000 536.00000
IMAGE=Paffser_ljuboten13o.tif
ID=affserlju13
LM=9
345.00000 660.00000
297.00000 373.00000
903.00000 647.00000
1094.00000 770.00000
1004.00000 523.00000
646.00000 587.00000
640.00000 412.00000
280.00000 592.00000
219.00000 491.00000
IMAGE=Paffser_ljuboten16o.tif
ID=affserlju16
LM=9
563.00000 685.00000
472.00000 411.00000
1106.00000 650.00000
1239.00000 728.00000
1134.00000 497.00000
850.00000 590.00000
842.00000 428.00000
476.00000 638.00000
402.00000 540.00000
IMAGE=Paffser_ljuboten17o.tif
ID=affserlju17
LM=9
431.00000 732.00000
332.00000 552.00000
768.00000 666.00000
926.00000 730.00000
795.00000 553.00000
593.00000 663.00000
582.00000 536.00000
345.00000 713.00000
300.00000 636.00000
IMAGE=Pamplia_durmitor2o.tif
ID=ampliadur2
LM=9
572.00000 625.00000
532.00000 421.00000
986.00000 624.00000
1089.00000 691.00000
965.00000 479.00000
805.00000 573.00000
766.00000 429.00000
517.00000 577.00000
459.00000 499.00000
IMAGE=Pamplia_durmitor4o.tif
ID=ampliadur4
LM=9
431.00000 813.00000
368.00000 422.00000
1067.00000 672.00000
1356.00000 739.00000
1138.00000 436.00000
769.00000 664.00000
754.00000 415.00000
333.00000 728.00000
228.00000 563.00000
IMAGE=Parteden_avar2o.jpg
ID=artedenava2
LM=9
263.00000 598.00000
214.00000 208.00000
904.00000 610.00000
1276.00000 812.00000
1099.00000 456.00000
602.00000 545.00000
671.00000 314.00000
163.00000 502.00000
96.00000 314.00000
IMAGE=Parteden_nafpaktos1o.jpg
ID=artedennaf1
LM=9
459.00000 625.00000
366.00000 403.00000
786.00000 558.00000
930.00000 642.00000
818.00000 415.00000
611.00000 540.00000
580.00000 382.00000
381.00000 563.00000
327.00000 478.00000
IMAGE=Pgracil_mratinje1o.tif
ID=gracilmra1
LM=9
353.00000 614.00000
334.00000 292.00000
1080.00000 689.00000
1254.00000 838.00000
1193.00000 538.00000
749.00000 549.00000
767.00000 356.00000
302.00000 535.00000
232.00000 402.00000
IMAGE=Phoelze_nidzhe1o.jpg
ID=hoelzenid1
LM=9
437.00000 636.00000
284.00000 328.00000
1041.00000 521.00000
1315.00000 652.00000
1095.00000 321.00000
732.00000 513.00000
706.00000 288.00000
305.00000 586.00000
204.00000 456.00000
IMAGE=Phoelze_nidzhe2o.jpg
ID=hoelzenid2
LM=9
458.00000 691.00000
207.00000 424.00000
1162.00000 575.00000
1384.00000 670.00000
1218.00000 385.00000
806.00000 532.00000
742.00000 320.00000
307.00000 674.00000
173.00000 551.00000
IMAGE=Phoelze_nidzhe6o.jpg
ID=hoelzenid6
LM=9
495.00000 684.00000
455.00000 442.00000
897.00000 743.00000
1056.00000 841.00000
1005.00000 600.00000
718.00000 657.00000
755.00000 493.00000
396.00000 624.00000
339.00000 524.00000
IMAGE=Pjablan_jablanica2o.jpg
ID=jablanjab2
LM=9
451.00000 571.00000
347.00000 287.00000
838.00000 519.00000
1145.00000 595.00000
969.00000 355.00000
644.00000 509.00000
669.00000 300.00000
342.00000 529.00000
282.00000 396.00000
IMAGE=Pnobili_kallithea1o.jpg
ID=nobilikal1
LM=9
533.00000 597.00000
374.00000 343.00000
910.00000 514.00000
1157.00000 573.00000
971.00000 343.00000
723.00000 512.00000
700.00000 327.00000
400.00000 585.00000
300.00000 457.00000
IMAGE=Pnobili_lalas1o.jpg
ID=nobililal1
LM=9
461.00000 601.00000
394.00000 368.00000
965.00000 522.00000
1178.00000 606.00000
1053.00000 403.00000
710.00000 509.00000
730.00000 358.00000
373.00000 565.00000
311.00000 473.00000
IMAGE=Pnonvei_susica7o.tif
ID=nonveisus7
LM=9
242.00000 674.00000
211.00000 323.00000
886.00000 623.00000
1220.00000 771.00000
1039.00000 461.00000
592.00000 581.00000
652.00000 367.00000
150.00000 590.00000
85.00000 437.00000
IMAGE=Pobesus_loanina14o.jpg
ID=obesusloa14
LM=9
301.00000 626.00000
274.00000 256.00000
958.00000 599.00000
1237.00000 750.00000
1147.00000 457.00000
649.00000 531.00000
693.00000 307.00000
204.00000 559.00000
143.00000 383.00000
IMAGE=Pobesus_loanina1o.jpg
ID=obesusloa1
LM=9
354.00000 790.00000
182.00000 472.00000
907.00000 588.00000
1275.00000 629.00000
990.00000 395.00000
610.00000 642.00000
622.00000 414.00000
206.00000 751.00000
93.00000 635.00000
IMAGE=Pobesus_loanina2o.jpg
ID=obesusloa2
LM=9
480.00000 657.00000
396.00000 410.00000
913.00000 573.00000
1138.00000 651.00000
1010.00000 456.00000
705.00000 564.00000
720.00000 412.00000
370.00000 589.00000
320.00000 492.00000
IMAGE=Ppoecil_popova11o.tif
ID=poecilpop11
LM=9
537.00000 710.00000
456.00000 448.00000
1040.00000 587.00000
1226.00000 649.00000
1109.00000 469.00000
787.00000 578.00000
801.00000 425.00000
459.00000 669.00000
378.00000 578.00000
IMAGE=Ppoecil_popova12o.tif
ID=poecilpop12
LM=9
538.00000 645.00000
335.00000 455.00000
943.00000 370.00000
1175.00000 354.00000
973.00000 225.00000
694.00000 463.00000
620.00000 324.00000
449.00000 654.00000
339.00000 571.00000
IMAGE=Ppoecil_popova14o.tif
ID=poecilpop14
LM=9
540.00000 639.00000
488.00000 396.00000
1027.00000 715.00000
1158.00000 828.00000
1103.00000 612.00000
809.00000 607.00000
838.00000 460.00000
480.00000 593.00000
426.00000 487.00000
IMAGE=Ppoecil_popova9o.tif
ID=poecilpop9
LM=9
387.00000 743.00000
245.00000 415.00000
1086.00000 591.00000
1376.00000 699.00000
1177.00000 418.00000
744.00000 573.00000
738.00000 369.00000
282.00000 678.00000
171.00000 550.00000
IMAGE=Ppoepse_sharmt1o.jpg
ID=poepsesha1
LM=9
378.00000 606.00000
288.00000 300.00000
1094.00000 779.00000
1250.00000 958.00000
1200.00000 670.00000
772.00000 606.00000
835.00000 456.00000
237.00000 530.00000
222.00000 395.00000
IMAGE=Ppseudo_1kamenagora10o.tif
ID=pseudokam10
LM=9
346.00000 605.00000
296.00000 286.00000
992.00000 719.00000
1249.00000 939.00000
1178.00000 659.00000
742.00000 606.00000
803.00000 458.00000
208.00000 508.00000
191.00000 366.00000
IMAGE=Ppseudo_1kamenagora11o.tif
ID=pseudokam11
LM=9
340.00000 775.00000
194.00000 491.00000
1036.00000 640.00000
1314.00000 736.00000
1184.00000 515.00000
712.00000 623.00000
707.00000 453.00000
228.00000 739.00000
161.00000 617.00000
IMAGE=Ppseudo_1kamenagora9o.tif
ID=pseudokam9
LM=9
346.00000 542.00000
362.00000 254.00000
1087.00000 669.00000
1293.00000 842.00000
1226.00000 602.00000
757.00000 530.00000
820.00000 400.00000
279.00000 421.00000
252.00000 306.00000
IMAGE=Ppseudo_durmitor5o.tif
ID=pseudoddur5
LM=9
251.00000 538.00000
273.00000 220.00000
1002.00000 732.00000
1212.00000 929.00000
1145.00000 632.00000
684.00000 578.00000
750.00000 418.00000
203.00000 444.00000
193.00000 305.00000
IMAGE=Ppseudo_durmitor6o.tif
ID=pseudodur6
LM=9
370.00000 546.00000
286.00000 262.00000
1089.00000 560.00000
1281.00000 669.00000
1152.00000 405.00000
769.00000 479.00000
786.00000 322.00000
288.00000 475.00000
228.00000 360.00000
IMAGE=Ppseudo_durmitor8o.tif
ID=pseudodur8
LM=9
292.00000 785.00000
204.00000 488.00000
1040.00000 782.00000
1279.00000 912.00000
1162.00000 667.00000
702.00000 700.00000
727.00000 543.00000
208.00000 711.00000
160.00000 592.00000
IMAGE=Ppseudo_durmitor9o.tif
ID=pseudodur9
LM=9
263.00000 529.00000
258.00000 166.00000
943.00000 747.00000
1158.00000 954.00000
1116.00000 678.00000
649.00000 562.00000
716.00000 406.00000
177.00000 381.00000
162.00000 237.00000
IMAGE=Ppseudo_vusanje10o.tif
ID=pseudovus10
LM=9
247.00000 648.00000
165.00000 354.00000
1016.00000 749.00000
1275.00000 937.00000
1180.00000 657.00000
693.00000 649.00000
752.00000 485.00000
167.00000 561.00000
107.00000 428.00000
IMAGE=Ppseudo_vusanje4o.tif
ID=pseudovus4
LM=9
220.00000 500.00000
211.00000 178.00000
1001.00000 676.00000
1214.00000 885.00000
1172.00000 601.00000
677.00000 517.00000
715.00000 356.00000
127.00000 397.00000
94.00000 259.00000
IMAGE=Ppseudo_vusanje9o.tif
ID=pseudovus9

## Sheet: tegmen
LM=13
725.00000 821.00000
811.00000 808.00000
917.00000 840.00000
1130.00000 698.00000
1087.00000 585.00000
1097.00000 512.00000
841.00000 234.00000
598.00000 690.00000
767.00000 662.00000
902.00000 550.00000
952.00000 481.00000
897.00000 402.00000
907.00000 647.00000
IMAGE=Paffaff_bratiya3t.tif
ID=affaffbra3
LM=13
660.00000 715.00000
719.00000 697.00000
836.00000 735.00000
1004.00000 621.00000
974.00000 528.00000
985.00000 440.00000
758.00000 207.00000
554.00000 601.00000
683.00000 586.00000
849.00000 478.00000
873.00000 437.00000
826.00000 350.00000
834.00000 564.00000
IMAGE=Paffaff_bratiya4t.tif
ID=affaffbra4
LM=13
697.00000 851.00000
764.00000 839.00000
865.00000 876.00000
1056.00000 738.00000
1017.00000 639.00000
1034.00000 562.00000
791.00000 321.00000
582.00000 710.00000
752.00000 670.00000
870.00000 596.00000
917.00000 552.00000
876.00000 481.00000
863.00000 690.00000
IMAGE=Paffaff_bratiya5t.tif
ID=affaffbra5
LM=13
717.00000 756.00000
792.00000 744.00000
917.00000 789.00000
1105.00000 650.00000
1065.00000 555.00000
1089.00000 465.00000
846.00000 181.00000
604.00000 629.00000
760.00000 617.00000
919.00000 505.00000
960.00000 436.00000
917.00000 358.00000
910.00000 593.00000
IMAGE=Paffaff_bratiya6t.tif
ID=affaffbra6
LM=13
785.00000 854.00000
864.00000 841.00000
942.00000 870.00000
1141.00000 728.00000
1106.00000 626.00000
1117.00000 555.00000
858.00000 303.00000
645.00000 702.00000
820.00000 668.00000
950.00000 584.00000
1004.00000 527.00000
949.00000 453.00000
947.00000 674.00000
IMAGE=Paffaff_bratiya7t.tif
ID=affaffbra7
LM=13
692.00000 765.00000
753.00000 760.00000
888.00000 795.00000
1093.00000 670.00000
1065.00000 564.00000
1083.00000 484.00000
823.00000 192.00000
595.00000 636.00000
747.00000 612.00000
889.00000 513.00000
958.00000 428.00000
898.00000 373.00000
886.00000 610.00000
IMAGE=Paffaff_kirilova1t.tif
ID=affaffkir1
LM=13
641.00000 767.00000
715.00000 751.00000
814.00000 804.00000
1042.00000 677.00000
1014.00000 580.00000
1036.00000 496.00000
805.00000 204.00000
555.00000 650.00000
707.00000 620.00000
844.00000 526.00000
910.00000 463.00000
866.00000 384.00000
826.00000 615.00000
IMAGE=Paffaff_kirilova2t.tif
ID=affaffkir2
LM=13
569.00000 743.00000
636.00000 736.00000
754.00000 772.00000
954.00000 660.00000
924.00000 562.00000
936.00000 479.00000
702.00000 196.00000
459.00000 603.00000
615.00000 584.00000
746.00000 484.00000
798.00000 408.00000
759.00000 340.00000
745.00000 580.00000
IMAGE=paffaff_osogovo1t.tif
ID=affaffoso1
LM=13
745.00000 745.00000
783.00000 733.00000
917.00000 787.00000
1108.00000 693.00000
1076.00000 598.00000
1102.00000 511.00000
836.00000 197.00000
636.00000 617.00000
794.00000 576.00000
929.00000 487.00000
945.00000 454.00000
924.00000 342.00000
913.00000 598.00000
IMAGE=Paffaff_osogovo2t.tif
ID=affaffoso2
LM=13
706.00000 750.00000
780.00000 743.00000
887.00000 758.00000
1098.00000 646.00000
1060.00000 560.00000
1093.00000 468.00000
835.00000 164.00000
594.00000 611.00000
739.00000 609.00000
883.00000 500.00000
946.00000 434.00000
904.00000 364.00000
875.00000 582.00000
IMAGE=Paffaff_osogovo3t.tif
ID=affaffoso3
LM=13
788.00000 803.00000
872.00000 798.00000
958.00000 823.00000
1142.00000 680.00000
1104.00000 600.00000
1114.00000 528.00000
856.00000 265.00000
667.00000 664.00000
823.00000 675.00000
949.00000 566.00000
986.00000 469.00000
891.00000 429.00000
947.00000 657.00000
IMAGE=Paffaff_osogovo4t.tif
ID=affaffoso4
LM=13
830.00000 763.00000
902.00000 751.00000
987.00000 779.00000
1207.00000 652.00000
1174.00000 568.00000
1198.00000 507.00000
946.00000 207.00000
733.00000 627.00000
877.00000 612.00000
1031.00000 536.00000
1083.00000 450.00000
1018.00000 405.00000
1005.00000 616.00000
IMAGE=Paffaff_osogovo5t.tif
ID=affaffoso5
LM=13
666.00000 786.00000
735.00000 769.00000
840.00000 810.00000
1045.00000 668.00000
1017.00000 585.00000
1027.00000 493.00000
804.00000 226.00000
572.00000 658.00000
728.00000 625.00000
850.00000 544.00000
930.00000 454.00000
876.00000 388.00000
847.00000 617.00000
IMAGE=Paffaff_osogovo6t.tif
ID=affaffoso6
LM=13
736.00000 879.00000
817.00000 854.00000
923.00000 888.00000
1113.00000 754.00000
1081.00000 660.00000
1097.00000 555.00000
844.00000 319.00000
624.00000 745.00000
774.00000 717.00000
908.00000 603.00000
942.00000 542.00000
955.00000 494.00000
899.00000 702.00000
IMAGE=Paffaff_osogovo7t.tif
ID=affaffoso7
LM=13
733.00000 818.00000
807.00000 800.00000
927.00000 836.00000
1135.00000 688.00000
1084.00000 614.00000
1116.00000 517.00000
840.00000 255.00000
614.00000 709.00000
778.00000 672.00000
899.00000 551.00000
934.00000 488.00000
883.00000 411.00000
902.00000 651.00000
IMAGE=Paffaff_osogovo8t.tif
ID=affaffoso8
LM=13
504.00000 892.00000
565.00000 882.00000
683.00000 912.00000
913.00000 797.00000
870.00000 701.00000
888.00000 607.00000
607.00000 271.00000
383.00000 748.00000
527.00000 731.00000
650.00000 644.00000
736.00000 537.00000
650.00000 464.00000
660.00000 722.00000
IMAGE=Paffaff_pirin1t.tif
ID=affaffpir1
LM=13
605.00000 937.00000
685.00000 922.00000
817.00000 961.00000
1026.00000 836.00000
977.00000 762.00000
1010.00000 655.00000
725.00000 343.00000
484.00000 805.00000
644.00000 788.00000
794.00000 700.00000
845.00000 619.00000
763.00000 522.00000
798.00000 788.00000
IMAGE=Paffaff_pirin2t.tif
ID=affaffpir2
LM=13
462.00000 747.00000
512.00000 726.00000
646.00000 780.00000
849.00000 670.00000
806.00000 586.00000
846.00000 478.00000
583.00000 211.00000
353.00000 619.00000
503.00000 598.00000
642.00000 498.00000
701.00000 427.00000
638.00000 370.00000
640.00000 594.00000
IMAGE=Paffaff_pirin3t.tif
ID=affaffpir3
LM=13
463.00000 766.00000
545.00000 737.00000
647.00000 767.00000
895.00000 631.00000
832.00000 532.00000
850.00000 444.00000
581.00000 137.00000
338.00000 610.00000
499.00000 592.00000
634.00000 469.00000
706.00000 381.00000
617.00000 294.00000
640.00000 562.00000
IMAGE=Paffaff_pirin4t.tif
ID=affaffpir4
LM=13
759.00000 792.00000
808.00000 779.00000
940.00000 819.00000
1131.00000 692.00000
1102.00000 610.00000
1122.00000 529.00000
882.00000 260.00000
659.00000 654.00000
823.00000 636.00000
949.00000 543.00000
981.00000 467.00000
927.00000 402.00000
934.00000 635.00000
IMAGE=Paffaff_rila11t.tif
ID=affaffril11
LM=13
702.00000 826.00000
746.00000 807.00000
887.00000 848.00000
1096.00000 704.00000
1055.00000 613.00000
1076.00000 531.00000
796.00000 251.00000
592.00000 694.00000
755.00000 666.00000
861.00000 564.00000
924.00000 461.00000
877.00000 399.00000
871.00000 655.00000
IMAGE=Paffaff_rila12t.tif
ID=affaffril12
LM=13
706.00000 789.00000
774.00000 781.00000
883.00000 820.00000
1110.00000 664.00000
1083.00000 585.00000
1105.00000 493.00000
836.00000 199.00000
588.00000 667.00000
791.00000 615.00000
897.00000 531.00000
950.00000 455.00000
895.00000 379.00000
882.00000 622.00000
IMAGE=Paffaff_rila5t.tif
ID=affaffril5
LM=13
619.00000 822.00000
660.00000 808.00000
802.00000 860.00000
1023.00000 726.00000
997.00000 637.00000
1010.00000 541.00000
736.00000 232.00000
509.00000 684.00000
685.00000 664.00000
821.00000 574.00000
883.00000 493.00000
814.00000 407.00000
811.00000 665.00000
IMAGE=Paffaff_rila6t.tif
ID=affaffril6
LM=13
731.00000 757.00000
788.00000 744.00000
904.00000 787.00000
1095.00000 673.00000
1051.00000 574.00000
1064.00000 504.00000
830.00000 254.00000
628.00000 614.00000
782.00000 607.00000
898.00000 521.00000
947.00000 443.00000
880.00000 368.00000
895.00000 608.00000
IMAGE=Paffaff_rila7t.tif
ID=affaffril7
LM=13
840.00000 779.00000
905.00000 762.00000
1023.00000 813.00000
1236.00000 660.00000
1216.00000 572.00000
1227.00000 484.00000
974.00000 181.00000
730.00000 625.00000
915.00000 610.00000
1031.00000 496.00000
1098.00000 385.00000
1046.00000 318.00000
1026.00000 599.00000
IMAGE=Paffaff_rila8t.tif
ID=affaffril8
LM=13
616.00000 775.00000
680.00000 759.00000
808.00000 815.00000
1002.00000 685.00000
988.00000 598.00000
1004.00000 517.00000
718.00000 203.00000
510.00000 619.00000
677.00000 612.00000
817.00000 526.00000
876.00000 441.00000
821.00000 379.00000
805.00000 620.00000
IMAGE=Paffaff_rila9t.tif
ID=affaffril9
LM=13
548.00000 841.00000
604.00000 826.00000
742.00000 870.00000
1000.00000 736.00000
966.00000 655.00000
994.00000 564.00000
684.00000 212.00000
417.00000 673.00000
601.00000 677.00000
784.00000 585.00000
833.00000 525.00000
743.00000 421.00000
758.00000 683.00000
IMAGE=Paffdin_susica1t.tif
ID=affdinsus1
LM=13
440.00000 793.00000
489.00000 784.00000
608.00000 829.00000
862.00000 726.00000
831.00000 635.00000
869.00000 544.00000
611.00000 254.00000
345.00000 636.00000
499.00000 653.00000
640.00000 569.00000
697.00000 472.00000
629.00000 404.00000
627.00000 647.00000
IMAGE=Paffhaj_hajla1t.tif
ID=affhajhaj1
LM=13
668.00000 771.00000
725.00000 760.00000
850.00000 791.00000
1055.00000 672.00000
994.00000 599.00000
1007.00000 510.00000
771.00000 251.00000
560.00000 659.00000
712.00000 627.00000
836.00000 545.00000
892.00000 469.00000
825.00000 412.00000
835.00000 617.00000
IMAGE=Paffhaj_hajla2t.tif
ID=affhajhaj2
LM=13
496.00000 876.00000
550.00000 858.00000
688.00000 906.00000
912.00000 769.00000
860.00000 672.00000
876.00000 580.00000
617.00000 292.00000
368.00000 739.00000
555.00000 723.00000
697.00000 620.00000
721.00000 510.00000
679.00000 479.00000
690.00000 720.00000
IMAGE=Paffhaj_hajla3t.tif
ID=affhajhaj3
LM=13
532.00000 886.00000
581.00000 889.00000
681.00000 929.00000
947.00000 799.00000
879.00000 730.00000
917.00000 650.00000
672.00000 344.00000
421.00000 769.00000
590.00000 734.00000
705.00000 678.00000
783.00000 617.00000
720.00000 529.00000
697.00000 750.00000
IMAGE=Paffhaj_hajla4t.tif
ID=affhajhaj4
LM=13
546.00000 777.00000
613.00000 770.00000
730.00000 812.00000
945.00000 700.00000
902.00000 606.00000
932.00000 516.00000
669.00000 230.00000
448.00000 657.00000
623.00000 622.00000
739.00000 545.00000
802.00000 476.00000
721.00000 402.00000
726.00000 644.00000
IMAGE=Paffhaj_hajla5t.tif
ID=affhajhaj5
LM=13
605.00000 843.00000
654.00000 828.00000
785.00000 875.00000
1009.00000 770.00000
965.00000 688.00000
1000.00000 585.00000
787.00000 307.00000
506.00000 698.00000
666.00000 701.00000
803.00000 626.00000
870.00000 530.00000
801.00000 488.00000
798.00000 708.00000
IMAGE=Paffhaj_hajla6t.tif
ID=affhajhaj6
LM=13
581.00000 867.00000
672.00000 835.00000
812.00000 874.00000
1098.00000 696.00000
1032.00000 578.00000
1046.00000 460.00000
702.00000 175.00000
401.00000 696.00000
631.00000 663.00000
744.00000 544.00000
826.00000 425.00000
768.00000 350.00000
775.00000 654.00000
IMAGE=Paffkom_luc1t.tif
ID=affkomluc1
LM=13
410.00000 856.00000
531.00000 828.00000
674.00000 860.00000
952.00000 660.00000
890.00000 558.00000
902.00000 428.00000
544.00000 117.00000
255.00000 637.00000
471.00000 659.00000
602.00000 530.00000
652.00000 427.00000
572.00000 343.00000
620.00000 627.00000
IMAGE=Paffkom_luc3t.tif
ID=affkomluc3
LM=13
455.00000 803.00000
589.00000 779.00000
742.00000 812.00000
1043.00000 678.00000
989.00000 555.00000
1012.00000 436.00000
680.00000 83.00000
322.00000 606.00000
558.00000 572.00000
732.00000 477.00000
819.00000 352.00000
712.00000 274.00000
732.00000 593.00000
IMAGE=Paffkom_luc4t.tif
ID=affkomluc4
LM=13
565.00000 908.00000
627.00000 902.00000
802.00000 961.00000
1069.00000 802.00000
1021.00000 696.00000
1050.00000 591.00000
742.00000 229.00000
421.00000 721.00000
612.00000 734.00000
793.00000 608.00000
860.00000 485.00000
809.00000 415.00000
802.00000 731.00000
IMAGE=Paffrum_kolasin10t.tif
ID=affrumkol10
LM=13
500.00000 905.00000
577.00000 888.00000
733.00000 941.00000
1014.00000 749.00000
972.00000 653.00000
978.00000 550.00000
752.00000 254.00000
360.00000 716.00000
547.00000 719.00000
734.00000 569.00000
802.00000 439.00000
718.00000 384.00000
729.00000 698.00000
IMAGE=Paffrum_kolasin11t.tif
ID=affrumkol11
LM=13
601.00000 898.00000
704.00000 878.00000
840.00000 907.00000
1109.00000 731.00000
1054.00000 611.00000
1060.00000 496.00000
745.00000 185.00000
438.00000 700.00000
640.00000 703.00000
836.00000 527.00000
864.00000 397.00000
773.00000 351.00000
838.00000 664.00000
IMAGE=Paffrum_kolasin12t.tif
ID=affrumkol12
LM=13
435.00000 912.00000
525.00000 913.00000
662.00000 959.00000
997.00000 812.00000
947.00000 687.00000
979.00000 555.00000
694.00000 152.00000
278.00000 692.00000
501.00000 709.00000
708.00000 588.00000
798.00000 449.00000
741.00000 390.00000
685.00000 712.00000
IMAGE=Paffrum_kolasin1t.tif
ID=affrumkol1
LM=13
625.00000 932.00000
711.00000 859.00000
856.00000 819.00000
994.00000 536.00000
895.00000 461.00000
833.00000 355.00000
305.00000 250.00000
412.00000 851.00000
550.00000 765.00000
634.00000 518.00000
616.00000 389.00000
509.00000 369.00000
710.00000 636.00000
IMAGE=Paffrum_kolasin2t.tif
ID=affrumkol2
LM=13
431.00000 827.00000
498.00000 798.00000
652.00000 868.00000
915.00000 729.00000
885.00000 619.00000
906.00000 510.00000
604.00000 170.00000
285.00000 670.00000
459.00000 664.00000
651.00000 513.00000
686.00000 402.00000
635.00000 353.00000
637.00000 643.00000
IMAGE=Paffrum_kolasin3t.tif
ID=affrumkol3
LM=13
474.00000 894.00000
571.00000 866.00000
753.00000 887.00000
995.00000 699.00000
949.00000 584.00000
965.00000 483.00000
656.00000 147.00000
324.00000 675.00000
508.00000 670.00000
696.00000 520.00000
751.00000 412.00000
674.00000 310.00000
710.00000 647.00000
IMAGE=Paffrum_kolasin4t.tif
ID=affrumkol4
LM=13
421.00000 853.00000
511.00000 840.00000
654.00000 871.00000
925.00000 704.00000
865.00000 574.00000
864.00000 501.00000
565.00000 179.00000
287.00000 679.00000
465.00000 681.00000
616.00000 539.00000
657.00000 401.00000
575.00000 342.00000
625.00000 648.00000
IMAGE=Paffrum_kolasin5t.tif
ID=affrumkol5
LM=13
558.00000 803.00000
631.00000 789.00000
794.00000 828.00000
1055.00000 672.00000
1011.00000 578.00000
1005.00000 491.00000
703.00000 171.00000
425.00000 625.00000
601.00000 621.00000
777.00000 496.00000
838.00000 397.00000
736.00000 323.00000
782.00000 612.00000
IMAGE=Paffrum_kolasin6t.tif
ID=affrumkol6
LM=13
513.00000 818.00000
575.00000 815.00000
727.00000 863.00000
1027.00000 706.00000
981.00000 573.00000
1030.00000 459.00000
710.00000 93.00000
362.00000 629.00000
536.00000 637.00000
720.00000 469.00000
792.00000 349.00000
748.00000 290.00000
721.00000 615.00000
IMAGE=Paffrum_kolasin7t.tif
ID=affrumkol7
LM=13
509.00000 884.00000
580.00000 869.00000
757.00000 899.00000
1031.00000 731.00000
986.00000 596.00000
997.00000 499.00000
662.00000 134.00000
361.00000 684.00000
548.00000 649.00000
756.00000 504.00000
827.00000 375.00000
706.00000 304.00000
746.00000 645.00000
IMAGE=Paffrum_kolasin8t.tif
ID=affrumkol8
LM=13
621.00000 901.00000
712.00000 868.00000
871.00000 885.00000
1106.00000 681.00000
1027.00000 562.00000
1034.00000 455.00000
666.00000 200.00000
427.00000 698.00000
620.00000 710.00000
794.00000 535.00000
838.00000 401.00000
718.00000 346.00000
813.00000 666.00000
IMAGE=Paffrum_kolasin9t.tif
ID=affrumkol9
LM=13
622.00000 815.00000
685.00000 800.00000
800.00000 838.00000
986.00000 714.00000
957.00000 653.00000
963.00000 578.00000
714.00000 303.00000
511.00000 687.00000
647.00000 677.00000
784.00000 588.00000
824.00000 505.00000
760.00000 462.00000
789.00000 665.00000
IMAGE=Paffser_ljuboten10t.tif
ID=affserlju10
LM=13
579.00000 788.00000
629.00000 776.00000
753.00000 817.00000
929.00000 701.00000
895.00000 632.00000
922.00000 557.00000
718.00000 271.00000
473.00000 668.00000
618.00000 635.00000
740.00000 555.00000
811.00000 472.00000
734.00000 419.00000
743.00000 646.00000
IMAGE=Paffser_ljuboten14t.tif
ID=affserlju14
LM=13
593.00000 799.00000
649.00000 797.00000
772.00000 854.00000
1010.00000 741.00000
965.00000 663.00000
996.00000 563.00000
746.00000 262.00000
483.00000 658.00000
635.00000 654.00000
799.00000 580.00000
839.00000 514.00000
760.00000 437.00000
784.00000 669.00000
IMAGE=Paffser_ljuboten15t.tif
ID=affserlju15
LM=13
639.00000 861.00000
729.00000 836.00000
834.00000 875.00000
1029.00000 719.00000
982.00000 663.00000
1002.00000 570.00000
733.00000 299.00000
515.00000 694.00000
692.00000 714.00000
799.00000 624.00000
835.00000 544.00000
792.00000 475.00000
807.00000 708.00000
IMAGE=Paffser_ljuboten19t.tif
ID=affserlju19
LM=13
473.00000 751.00000
546.00000 736.00000
676.00000 778.00000
868.00000 642.00000
824.00000 564.00000
841.00000 485.00000
599.00000 205.00000
373.00000 612.00000
525.00000 596.00000
658.00000 503.00000
707.00000 423.00000
653.00000 365.00000
661.00000 597.00000
IMAGE=Paffser_ljuboten1t.tif
ID=affserlju1
LM=13
665.00000 807.00000
741.00000 780.00000
857.00000 814.00000
1043.00000 686.00000
1013.00000 614.00000
1020.00000 529.00000
775.00000 247.00000
544.00000 615.00000
702.00000 644.00000
862.00000 525.00000
892.00000 445.00000
823.00000 401.00000
849.00000 644.00000
IMAGE=Paffser_ljuboten20t.tif
ID=affserlju20
LM=13
593.00000 814.00000
669.00000 782.00000
768.00000 816.00000
976.00000 687.00000
932.00000 606.00000
952.00000 519.00000
719.00000 223.00000
451.00000 650.00000
636.00000 643.00000
757.00000 528.00000
779.00000 455.00000
713.00000 406.00000
757.00000 647.00000
IMAGE=Paffser_ljuboten2t.tif
ID=affserlju2
LM=13
617.00000 762.00000
679.00000 734.00000
795.00000 768.00000
1000.00000 623.00000
939.00000 553.00000
951.00000 476.00000
727.00000 217.00000
499.00000 624.00000
638.00000 615.00000
737.00000 497.00000
800.00000 394.00000
748.00000 352.00000
763.00000 593.00000
IMAGE=Paffser_ljuboten3t.tif
ID=affserlju3
LM=13
547.00000 778.00000
619.00000 755.00000
731.00000 780.00000
907.00000 661.00000
865.00000 576.00000
874.00000 492.00000
624.00000 245.00000
437.00000 644.00000
588.00000 626.00000
661.00000 524.00000
724.00000 449.00000
622.00000 410.00000
696.00000 618.00000
IMAGE=Paffser_ljuboten4t.tif
ID=affserlju4
LM=13
547.00000 749.00000
612.00000 744.00000
731.00000 793.00000
959.00000 661.00000
924.00000 599.00000
951.00000 500.00000
698.00000 191.00000
442.00000 606.00000
606.00000 606.00000
730.00000 528.00000
813.00000 460.00000
750.00000 383.00000
735.00000 607.00000
IMAGE=Paffser_ljuboten5t.tif
ID=affserlju5
LM=13
588.00000 857.00000
667.00000 850.00000
775.00000 883.00000
973.00000 760.00000
930.00000 686.00000
947.00000 607.00000
714.00000 314.00000
492.00000 712.00000
634.00000 722.00000
738.00000 643.00000
805.00000 553.00000
751.00000 490.00000
754.00000 719.00000
IMAGE=Paffser_ljuboten6t.tif
ID=affserlju6
LM=13
573.00000 797.00000
640.00000 775.00000
766.00000 824.00000
979.00000 670.00000
945.00000 578.00000
964.00000 502.00000
699.00000 207.00000
459.00000 624.00000
633.00000 644.00000
706.00000 546.00000
778.00000 456.00000
699.00000 380.00000
731.00000 634.00000
IMAGE=Paffser_ljuboten7t.tif
ID=affserlju7
LM=13
565.00000 760.00000
625.00000 742.00000
743.00000 781.00000
929.00000 656.00000
886.00000 571.00000
899.00000 507.00000
687.00000 247.00000
459.00000 642.00000
606.00000 599.00000
724.00000 506.00000
769.00000 440.00000
719.00000 396.00000
735.00000 600.00000
IMAGE=Paffser_ljuboten8t.tif
ID=affserlju8
LM=13
569.00000 852.00000
628.00000 838.00000
754.00000 879.00000
973.00000 729.00000
931.00000 658.00000
951.00000 569.00000
670.00000 292.00000
479.00000 707.00000
624.00000 698.00000
769.00000 598.00000
816.00000 509.00000
737.00000 462.00000
764.00000 689.00000
IMAGE=Paffser_ljuboten9t.tif
ID=affserlju9
LM=13
536.00000 718.00000
593.00000 701.00000
726.00000 740.00000
955.00000 604.00000
929.00000 520.00000
952.00000 422.00000
672.00000 105.00000
414.00000 545.00000
588.00000 518.00000
805.00000 367.00000
819.00000 339.00000
748.00000 286.00000
753.00000 543.00000
IMAGE=Phoelze_nidzhe3t.jpg
ID=hoelzenid3
LM=13
566.00000 791.00000
656.00000 769.00000
782.00000 844.00000
1015.00000 714.00000
995.00000 631.00000
1032.00000 525.00000
799.00000 182.00000
482.00000 586.00000
657.00000 605.00000
917.00000 442.00000
912.00000 375.00000
847.00000 288.00000
830.00000 642.00000
IMAGE=Phoelze_nidzhe4t.jpg
ID=hoelzenid4
LM=13
667.00000 783.00000
775.00000 755.00000
899.00000 808.00000
1153.00000 625.00000
1132.00000 504.00000
1142.00000 412.00000
814.00000 34.00000
494.00000 551.00000
755.00000 535.00000
992.00000 332.00000
973.00000 292.00000
878.00000 201.00000
926.00000 552.00000
IMAGE=Phoelze_nidzhe5t.jpg
ID=hoelzenid5
LM=13
584.00000 836.00000
697.00000 805.00000
845.00000 860.00000
1078.00000 684.00000
1056.00000 586.00000
1077.00000 481.00000
744.00000 117.00000
422.00000 616.00000
663.00000 606.00000
852.00000 457.00000
861.00000 378.00000
779.00000 305.00000
840.00000 614.00000
IMAGE=Phoelze_nidzhe7t.jpg
ID=hoelzenid7
LM=13
540.00000 870.00000
611.00000 850.00000
794.00000 902.00000
1083.00000 728.00000
1053.00000 623.00000
1064.00000 491.00000
696.00000 110.00000
392.00000 641.00000
612.00000 610.00000
878.00000 388.00000
854.00000 337.00000
745.00000 304.00000
818.00000 641.00000
IMAGE=Phoelze_nidzhe8t.jpg
ID=hoelzenid8
LM=13
625.00000 806.00000
728.00000 777.00000
851.00000 828.00000
1153.00000 679.00000
1120.00000 557.00000
1146.00000 448.00000
811.00000 48.00000
472.00000 561.00000
707.00000 582.00000
980.00000 387.00000
953.00000 310.00000
903.00000 239.00000
894.00000 589.00000
IMAGE=Phoelze_nidzhe9t.jpg
ID=hoelzenid9
LM=13
732.00000 750.00000
781.00000 731.00000
866.00000 759.00000
1067.00000 678.00000
1000.00000 583.00000
1006.00000 500.00000
838.00000 319.00000
613.00000 598.00000
735.00000 602.00000
855.00000 539.00000
924.00000 467.00000
865.00000 401.00000
859.00000 598.00000
IMAGE=Pjablan_jablanica1t.jpg
ID=jablanjab1
LM=13
594.00000 739.00000
646.00000 723.00000
741.00000 764.00000
962.00000 648.00000
915.00000 560.00000
930.00000 509.00000
716.00000 263.00000
475.00000 573.00000
594.00000 584.00000
751.00000 532.00000
816.00000 437.00000
765.00000 373.00000
750.00000 568.00000
IMAGE=Pjablan_jablanica4t.jpg
ID=jablanjab4
LM=13
644.00000 709.00000
693.00000 702.00000
788.00000 729.00000
982.00000 636.00000
936.00000 547.00000
937.00000 465.00000
734.00000 260.00000
534.00000 564.00000
654.00000 577.00000
772.00000 506.00000
855.00000 406.00000
791.00000 357.00000
778.00000 569.00000
IMAGE=Pjablan_jablanica5t.jpg
ID=jablanjab5
LM=13
567.00000 630.00000
632.00000 618.00000
781.00000 670.00000
969.00000 579.00000
926.00000 477.00000
943.00000 403.00000
691.00000 187.00000
482.00000 499.00000
644.00000 494.00000
663.00000 454.00000
780.00000 422.00000
709.00000 320.00000
686.00000 500.00000
IMAGE=Pnobili_lalas2t.jpg
ID=nobililal2
LM=13
637.00000 732.00000
707.00000 691.00000
869.00000 739.00000
1037.00000 639.00000
988.00000 530.00000
1001.00000 441.00000
766.00000 219.00000
549.00000 574.00000
716.00000 549.00000
723.00000 482.00000
903.00000 402.00000
807.00000 331.00000
756.00000 549.00000
IMAGE=Pnobili_mitinas1t.jpg
ID=nobilimit1
LM=13
680.00000 769.00000
742.00000 753.00000
872.00000 821.00000
1081.00000 712.00000
1042.00000 622.00000
1048.00000 543.00000
802.00000 283.00000
578.00000 621.00000
766.00000 625.00000
772.00000 578.00000
917.00000 490.00000
804.00000 456.00000
807.00000 635.00000
IMAGE=Pnobili_nemea1t.jpg
ID=nobilinem1
LM=13
549.00000 776.00000
632.00000 756.00000
745.00000 788.00000
938.00000 665.00000
880.00000 569.00000
889.00000 465.00000
651.00000 202.00000
433.00000 626.00000
619.00000 605.00000
714.00000 502.00000
765.00000 412.00000
696.00000 348.00000
710.00000 602.00000
IMAGE=Pnonvei_susica10t.tif
ID=nonveisus10
LM=13
606.00000 809.00000
676.00000 794.00000
779.00000 823.00000
971.00000 718.00000
930.00000 633.00000
955.00000 544.00000
692.00000 270.00000
492.00000 667.00000
652.00000 676.00000
751.00000 595.00000
799.00000 504.00000
731.00000 428.00000
751.00000 671.00000
IMAGE=Pnonvei_susica11t.tif
ID=nonveisus11
LM=13
562.00000 805.00000
622.00000 784.00000
742.00000 831.00000
928.00000 721.00000
883.00000 636.00000
915.00000 545.00000
678.00000 275.00000
447.00000 672.00000
623.00000 653.00000
751.00000 568.00000
795.00000 489.00000
721.00000 424.00000
742.00000 662.00000
IMAGE=Pnonvei_susica12t.tif
ID=nonveisus12
LM=13
509.00000 760.00000
573.00000 749.00000
680.00000 792.00000
867.00000 669.00000
827.00000 585.00000
844.00000 506.00000
625.00000 252.00000
401.00000 632.00000
550.00000 627.00000
683.00000 520.00000
723.00000 445.00000
658.00000 391.00000
681.00000 617.00000
IMAGE=Pnonvei_susica1t.tif
ID=nonveisus1
LM=13
638.00000 878.00000
711.00000 857.00000
811.00000 896.00000
1028.00000 763.00000
982.00000 669.00000
996.00000 580.00000
701.00000 310.00000
500.00000 703.00000
664.00000 718.00000
809.00000 596.00000
840.00000 499.00000
753.00000 447.00000
809.00000 706.00000
IMAGE=Pnonvei_susica2t.tif
ID=nonveisus2
LM=13
593.00000 808.00000
673.00000 789.00000
768.00000 823.00000
945.00000 702.00000
914.00000 631.00000
933.00000 536.00000
693.00000 276.00000
480.00000 654.00000
655.00000 639.00000
753.00000 568.00000
798.00000 479.00000
708.00000 424.00000
752.00000 650.00000
IMAGE=Pnonvei_susica3t.tif
ID=nonveisus3
LM=13
598.00000 775.00000
669.00000 755.00000
770.00000 791.00000
949.00000 668.00000
906.00000 582.00000
921.00000 513.00000
665.00000 269.00000
475.00000 649.00000
636.00000 621.00000
749.00000 537.00000
793.00000 455.00000
671.00000 405.00000
752.00000 620.00000
IMAGE=Pnonvei_susica4t.tif
ID=nonveisus4
LM=13
565.00000 736.00000
634.00000 723.00000
732.00000 760.00000
920.00000 648.00000
884.00000 569.00000
894.00000 503.00000
671.00000 243.00000
453.00000 604.00000
579.00000 578.00000
750.00000 528.00000
782.00000 433.00000
687.00000 394.00000
745.00000 599.00000
IMAGE=Pnonvei_susica5t.tif
ID=nonveisus5
LM=13
629.00000 870.00000
703.00000 852.00000
792.00000 880.00000
968.00000 766.00000
926.00000 681.00000
932.00000 616.00000
693.00000 382.00000
503.00000 726.00000
616.00000 720.00000
788.00000 636.00000
821.00000 542.00000
750.00000 500.00000
782.00000 708.00000
IMAGE=Pnonvei_susica6t.tif
ID=nonveisus6
LM=13
536.00000 809.00000
587.00000 792.00000
708.00000 812.00000
895.00000 687.00000
851.00000 593.00000
863.00000 523.00000
613.00000 270.00000
394.00000 665.00000
556.00000 658.00000
683.00000 538.00000
710.00000 455.00000
661.00000 406.00000
689.00000 636.00000
IMAGE=Pnonvei_susica9t.tif
ID=nonveisus9
LM=13
556.00000 854.00000
651.00000 829.00000
816.00000 893.00000
1073.00000 719.00000
1025.00000 617.00000
1056.00000 491.00000
769.00000 175.00000
418.00000 684.00000
636.00000 640.00000
878.00000 484.00000
802.00000 410.00000
706.00000 388.00000
838.00000 651.00000
IMAGE=Pobesus_loanina10t.jpg
ID=obesusloa10
LM=13
544.00000 757.00000
630.00000 730.00000
772.00000 786.00000
1002.00000 617.00000
948.00000 516.00000
975.00000 421.00000
696.00000 121.00000
411.00000 569.00000
602.00000 567.00000
837.00000 399.00000
783.00000 331.00000
719.00000 292.00000
792.00000 572.00000
IMAGE=Pobesus_loanina11t.jpg
ID=obesusloa11
LM=13
519.00000 795.00000
623.00000 763.00000
745.00000 812.00000
1000.00000 655.00000
953.00000 547.00000
974.00000 457.00000
698.00000 150.00000
393.00000 627.00000
561.00000 603.00000
806.00000 408.00000
762.00000 358.00000
708.00000 326.00000
781.00000 597.00000
IMAGE=Pobesus_loanina13t.jpg
ID=obesusloa13
LM=13
793.00000 858.00000
884.00000 825.00000
1026.00000 869.00000
1264.00000 710.00000
1213.00000 618.00000
1225.00000 513.00000
940.00000 222.00000
665.00000 697.00000
808.00000 703.00000
1070.00000 480.00000
1032.00000 412.00000
996.00000 379.00000
1040.00000 665.00000
IMAGE=Pobesus_loanina3t.jpg
ID=obesusloa3
LM=13
603.00000 725.00000
737.00000 688.00000
855.00000 770.00000
1114.00000 607.00000
1077.00000 520.00000
1104.00000 417.00000
832.00000 80.00000
493.00000 543.00000
699.00000 526.00000
939.00000 373.00000
890.00000 322.00000
843.00000 270.00000
888.00000 545.00000
IMAGE=Pobesus_loanina4t.jpg
ID=obesusloa4
LM=13
622.00000 840.00000
730.00000 821.00000
849.00000 888.00000
1093.00000 740.00000
1059.00000 659.00000
1092.00000 552.00000
802.00000 241.00000
489.00000 656.00000
729.00000 642.00000
973.00000 485.00000
914.00000 439.00000
893.00000 391.00000
882.00000 661.00000
IMAGE=Pobesus_loanina5t.jpg
ID=obesusloa5
LM=13
618.00000 791.00000
720.00000 760.00000
855.00000 817.00000
1082.00000 664.00000
1034.00000 569.00000
1059.00000 457.00000
797.00000 174.00000
497.00000 612.00000
684.00000 603.00000
934.00000 426.00000
904.00000 379.00000
851.00000 340.00000
874.00000 603.00000
IMAGE=Pobesus_loanina6t.jpg
ID=obesusloa6
LM=13
591.00000 716.00000
669.00000 703.00000
826.00000 779.00000
1064.00000 664.00000
1020.00000 567.00000
1053.00000 468.00000
785.00000 163.00000
484.00000 545.00000
687.00000 514.00000
923.00000 403.00000
869.00000 334.00000
819.00000 297.00000
864.00000 571.00000
IMAGE=Pobesus_loanina7t.jpg
ID=obesusloa7
LM=13
760.00000 752.00000
806.00000 743.00000
940.00000 787.00000
1142.00000 687.00000
1112.00000 620.00000
1134.00000 527.00000
860.00000 243.00000
668.00000 617.00000
822.00000 599.00000
950.00000 524.00000
988.00000 454.00000
955.00000 411.00000
949.00000 607.00000
IMAGE=Ppoecil_popova10t.tif
ID=poecilpop10
LM=13
509.00000 757.00000
559.00000 745.00000
685.00000 789.00000
886.00000 672.00000
856.00000 601.00000
873.00000 512.00000
630.00000 228.00000
410.00000 632.00000
574.00000 612.00000
704.00000 526.00000
733.00000 471.00000
675.00000 390.00000
691.00000 620.00000
IMAGE=Ppoecil_popova13t.tif
ID=poecilpop13
LM=13
601.00000 814.00000
663.00000 797.00000
756.00000 829.00000
980.00000 688.00000
945.00000 609.00000
962.00000 521.00000
717.00000 199.00000
491.00000 650.00000
636.00000 625.00000
774.00000 538.00000
826.00000 426.00000
746.00000 384.00000
766.00000 636.00000
IMAGE=Ppoecil_popova15t.tif
ID=poecilpop15
LM=13
455.00000 783.00000
521.00000 778.00000
654.00000 804.00000
859.00000 664.00000
817.00000 580.00000
845.00000 485.00000
593.00000 198.00000
348.00000 652.00000
510.00000 622.00000
636.00000 520.00000
669.00000 429.00000
602.00000 357.00000
638.00000 610.00000
IMAGE=Ppoecil_popova16t.tif
ID=poecilpop16
LM=13
640.00000 789.00000
683.00000 770.00000
802.00000 819.00000
1020.00000 679.00000
980.00000 607.00000
990.00000 528.00000
759.00000 258.00000
535.00000 632.00000
688.00000 638.00000
816.00000 550.00000
836.00000 472.00000
796.00000 421.00000
802.00000 638.00000
IMAGE=Ppoecil_popova1t.tif
ID=poecilpop1
LM=13
660.00000 828.00000
711.00000 800.00000
826.00000 809.00000
1018.00000 621.00000
972.00000 569.00000
965.00000 455.00000
668.00000 237.00000
522.00000 703.00000
672.00000 669.00000
785.00000 541.00000
804.00000 425.00000
724.00000 405.00000
800.00000 635.00000
IMAGE=Ppoecil_popova2t.tif
ID=poecilpop2
LM=13
564.00000 826.00000
633.00000 815.00000
728.00000 843.00000
950.00000 664.00000
912.00000 602.00000
910.00000 526.00000
702.00000 276.00000
459.00000 680.00000
603.00000 660.00000
714.00000 562.00000
715.00000 472.00000
677.00000 439.00000
717.00000 652.00000
IMAGE=Ppoecil_popova3t.tif
ID=poecilpop3
LM=13
650.00000 798.00000
721.00000 782.00000
849.00000 810.00000
1053.00000 673.00000
1012.00000 590.00000
1023.00000 528.00000
734.00000 218.00000
541.00000 665.00000
701.00000 622.00000
821.00000 530.00000
861.00000 448.00000
800.00000 386.00000
821.00000 622.00000
IMAGE=Ppoecil_popova4t.tif
ID=poecilpop4
LM=13
546.00000 847.00000
607.00000 826.00000
744.00000 883.00000
965.00000 749.00000
931.00000 665.00000
969.00000 563.00000
707.00000 222.00000
436.00000 709.00000
626.00000 661.00000
754.00000 589.00000
809.00000 508.00000
761.00000 431.00000
743.00000 684.00000
IMAGE=Ppoecil_popova5t.tif
ID=poecilpop5
LM=13
774.00000 773.00000
808.00000 773.00000
908.00000 817.00000
1119.00000 675.00000
1095.00000 613.00000
1106.00000 530.00000
830.00000 235.00000
629.00000 634.00000
770.00000 631.00000
898.00000 544.00000
942.00000 474.00000
872.00000 416.00000
898.00000 639.00000
IMAGE=Ppoecil_popova6t.tif
ID=poecilpop6
LM=13
670.00000 722.00000
735.00000 712.00000
855.00000 753.00000
1083.00000 623.00000
1041.00000 537.00000
1069.00000 431.00000
823.00000 142.00000
570.00000 596.00000
721.00000 548.00000
840.00000 471.00000
876.00000 395.00000
840.00000 329.00000
837.00000 559.00000
IMAGE=Ppoecil_popova7t.tif
ID=poecilpop7
LM=13
673.00000 896.00000
726.00000 885.00000
856.00000 904.00000
1028.00000 774.00000
1008.00000 712.00000
1017.00000 636.00000
794.00000 379.00000
583.00000 758.00000
725.00000 745.00000
828.00000 669.00000
849.00000 599.00000
799.00000 554.00000
829.00000 743.00000
IMAGE=Ppoecil_popova8t.tif
ID=poecilpop8
LM=13
507.00000 860.00000
578.00000 849.00000
726.00000 883.00000
946.00000 750.00000
918.00000 661.00000
926.00000 574.00000
613.00000 239.00000
369.00000 663.00000
533.00000 679.00000
691.00000 575.00000
752.00000 497.00000
657.00000 410.00000
694.00000 677.00000
IMAGE=Ppseudo_1kamenagora1t.tif
ID=pseudokam1
LM=13
569.00000 850.00000
636.00000 837.00000
810.00000 888.00000
1031.00000 712.00000
983.00000 627.00000
1004.00000 522.00000
717.00000 210.00000
440.00000 693.00000
612.00000 681.00000
769.00000 589.00000
815.00000 469.00000
747.00000 422.00000
773.00000 669.00000
IMAGE=Ppseudo_1kamenagora2t.tif
ID=pseudokam2
LM=13
517.00000 813.00000
566.00000 807.00000
723.00000 874.00000
995.00000 719.00000
961.00000 636.00000
1007.00000 528.00000
686.00000 181.00000
407.00000 654.00000
568.00000 643.00000
749.00000 523.00000
810.00000 427.00000
728.00000 361.00000
741.00000 636.00000
IMAGE=Ppseudo_1kamenagora3t.tif
ID=pseudokam3
LM=13
618.00000 736.00000
661.00000 730.00000
821.00000 789.00000
1034.00000 658.00000
1012.00000 569.00000
1037.00000 448.00000
742.00000 136.00000
493.00000 580.00000
655.00000 569.00000
809.00000 476.00000
879.00000 371.00000
788.00000 312.00000
805.00000 566.00000
IMAGE=Ppseudo_1kamenagora4t.tif
ID=pseudokam4
LM=13
707.00000 742.00000
797.00000 728.00000
907.00000 770.00000
1119.00000 634.00000
1084.00000 556.00000
1108.00000 473.00000
844.00000 169.00000
605.00000 604.00000
764.00000 574.00000
921.00000 486.00000
970.00000 407.00000
898.00000 332.00000
911.00000 576.00000
IMAGE=Ppseudo_1kamenagora5t.tif
ID=pseudokam5
LM=13
563.00000 879.00000
630.00000 866.00000
765.00000 912.00000
1014.00000 754.00000
980.00000 671.00000
1006.00000 593.00000
700.00000 247.00000
449.00000 729.00000
580.00000 725.00000
739.00000 607.00000
806.00000 503.00000
746.00000 451.00000
736.00000 708.00000
IMAGE=Ppseudo_1kamenagora6t.tif
ID=pseudokam6
LM=13
617.00000 859.00000
680.00000 850.00000
841.00000 896.00000
1080.00000 733.00000
1031.00000 655.00000
1060.00000 537.00000
755.00000 188.00000
477.00000 651.00000
637.00000 669.00000
804.00000 541.00000
870.00000 451.00000
769.00000 379.00000
809.00000 663.00000
IMAGE=Ppseudo_1kamenagora7t.tif
ID=pseudokam7
LM=13
593.00000 898.00000
668.00000 882.00000
786.00000 931.00000
1047.00000 797.00000
1019.00000 717.00000
1055.00000 608.00000
774.00000 284.00000
505.00000 702.00000
635.00000 726.00000
788.00000 655.00000
855.00000 565.00000
793.00000 507.00000
790.00000 731.00000
IMAGE=Ppseudo_1kamenagora8t.tif
ID=pseudokam8
LM=13
662.00000 788.00000
747.00000 778.00000
888.00000 819.00000
1092.00000 682.00000
1079.00000 607.00000
1115.00000 512.00000
804.00000 112.00000
542.00000 631.00000
741.00000 591.00000
878.00000 508.00000
948.00000 407.00000
860.00000 329.00000
874.00000 607.00000
IMAGE=Ppseudo_durmitor10t.tif
ID=pseudodur10
LM=13
675.00000 867.00000
775.00000 835.00000
903.00000 871.00000
1098.00000 752.00000
1075.00000 668.00000
1112.00000 550.00000
850.00000 209.00000
566.00000 691.00000
728.00000 674.00000
902.00000 582.00000
985.00000 460.00000
879.00000 407.00000
892.00000 668.00000
IMAGE=Ppseudo_durmitor1t.tif
ID=pseudodur1
LM=13
593.00000 886.00000
683.00000 876.00000
805.00000 919.00000
1055.00000 748.00000
1002.00000 661.00000
1041.00000 548.00000
699.00000 198.00000
457.00000 730.00000
635.00000 714.00000
781.00000 602.00000
862.00000 527.00000
755.00000 409.00000
781.00000 693.00000
IMAGE=Ppseudo_durmitor2t.tif
ID=pseudodur2
LM=13
652.00000 790.00000
714.00000 776.00000
863.00000 819.00000
1095.00000 677.00000
1054.00000 573.00000
1082.00000 478.00000
776.00000 151.00000
514.00000 561.00000
695.00000 627.00000
860.00000 502.00000
930.00000 413.00000
858.00000 336.00000
855.00000 607.00000
IMAGE=Ppseudo_durmitor3t.tif
ID=pseudodur3
LM=13
675.00000 795.00000
764.00000 769.00000
903.00000 805.00000
1133.00000 676.00000
1098.00000 579.00000
1117.00000 482.00000
817.00000 130.00000
553.00000 622.00000
711.00000 613.00000
857.00000 523.00000
918.00000 400.00000
858.00000 341.00000
864.00000 605.00000
IMAGE=Ppseudo_durmitor4t.tif
ID=pseudodur4
LM=13
540.00000 797.00000
630.00000 772.00000
759.00000 817.00000
988.00000 658.00000
957.00000 587.00000
980.00000 481.00000
686.00000 144.00000
424.00000 645.00000
597.00000 628.00000
736.00000 524.00000
791.00000 417.00000
721.00000 354.00000
740.00000 619.00000
IMAGE=Ppseudo_durmitor7t.tif
ID=pseudodur7
LM=13
552.00000 786.00000
633.00000 781.00000
770.00000 815.00000
1014.00000 707.00000
992.00000 621.00000
1021.00000 498.00000
710.00000 177.00000
460.00000 645.00000
610.00000 633.00000
766.00000 542.00000
829.00000 454.00000
758.00000 413.00000
769.00000 630.00000
IMAGE=Ppseudo_tresnjevik1t.tif
ID=pseudotre1
LM=13
580.00000 817.00000
645.00000 805.00000
781.00000 848.00000
999.00000 706.00000
964.00000 617.00000
988.00000 522.00000
764.00000 209.00000
468.00000 651.00000
636.00000 633.00000
812.00000 544.00000
834.00000 442.00000
783.00000 401.00000
792.00000 645.00000
IMAGE=Ppseudo_tresnjevik2t.tif
ID=pseudotre2
LM=13
560.00000 860.00000
636.00000 848.00000
792.00000 897.00000
1013.00000 736.00000
974.00000 653.00000
986.00000 569.00000
714.00000 247.00000
450.00000 689.00000
618.00000 697.00000
754.00000 593.00000
816.00000 482.00000
755.00000 436.00000
761.00000 687.00000
IMAGE=Ppseudo_tresnjevik3t.tif
ID=pseudotre3
LM=13
711.00000 824.00000
782.00000 806.00000
928.00000 864.00000
1162.00000 715.00000
1134.00000 632.00000
1179.00000 517.00000
864.00000 158.00000
595.00000 647.00000
769.00000 645.00000
909.00000 554.00000
946.00000 459.00000
869.00000 405.00000
907.00000 649.00000
IMAGE=Ppseudo_tresnjevik4t.tif
ID=pseudotre4
LM=13
616.00000 802.00000
690.00000 793.00000
828.00000 836.00000
1045.00000 701.00000
1002.00000 608.00000
1032.00000 514.00000
765.00000 203.00000
503.00000 655.00000
654.00000 641.00000
821.00000 560.00000
857.00000 463.00000
802.00000 412.00000
822.00000 645.00000
IMAGE=Ppseudo_tresnjevik5t.tif
ID=pseudotre5
LM=13
515.00000 807.00000
576.00000 800.00000
707.00000 845.00000
950.00000 698.00000
909.00000 617.00000
933.00000 522.00000
651.00000 212.00000
410.00000 651.00000
560.00000 660.00000
692.00000 549.00000
764.00000 454.00000
683.00000 402.00000
702.00000 645.00000
IMAGE=Ppseudo_vusanje1t.tif
ID=pseudovus1
LM=13
659.00000 865.00000
755.00000 854.00000
861.00000 897.00000
1101.00000 736.00000
1056.00000 641.00000
1069.00000 533.00000
797.00000 248.00000
547.00000 720.00000
698.00000 704.00000
874.00000 579.00000
912.00000 471.00000
825.00000 417.00000
863.00000 681.00000
IMAGE=Ppseudo_vusanje2t.tif
ID=pseudovus2
[truncated: 80 more rows]

## Sheet: cercus
LM=13
930.00000 768.00000
1128.00000 723.00000
1092.00000 101.00000
1095.00000 184.00000
1051.00000 448.00000
895.00000 453.00000
1088.00000 584.00000
890.00000 592.00000
1039.00000 290.00000
946.00000 246.00000
1163.00000 161.00000
1169.00000 128.00000
1204.00000 149.00000
IMAGE=Paffaff_bratiya1c.tif
ID=affaffbra1
LM=13
843.00000 724.00000
1029.00000 711.00000
1107.00000 109.00000
1109.00000 184.00000
997.00000 458.00000
858.00000 457.00000
1011.00000 592.00000
842.00000 590.00000
1020.00000 296.00000
922.00000 259.00000
1178.00000 177.00000
1190.00000 150.00000
1212.00000 176.00000
IMAGE=Paffaff_bratiya2c.tif
ID=affaffbra2
LM=13
926.00000 746.00000
1132.00000 654.00000
1080.00000 134.00000
1093.00000 221.00000
1060.00000 455.00000
902.00000 459.00000
1096.00000 551.00000
895.00000 577.00000
1046.00000 317.00000
934.00000 265.00000
1149.00000 201.00000
1158.00000 161.00000
1190.00000 180.00000
IMAGE=Paffaff_bratiya3c.tif
ID=affaffbra3
LM=13
882.00000 767.00000
1074.00000 684.00000
1042.00000 134.00000
1052.00000 208.00000
1004.00000 457.00000
863.00000 467.00000
1037.00000 578.00000
861.00000 605.00000
993.00000 327.00000
889.00000 295.00000
1105.00000 192.00000
1117.00000 164.00000
1138.00000 174.00000
IMAGE=Paffaff_bratiya4c.tif
ID=affaffbra4
LM=13
926.00000 831.00000
1141.00000 754.00000
1104.00000 172.00000
1110.00000 256.00000
1072.00000 543.00000
905.00000 546.00000
1098.00000 655.00000
900.00000 690.00000
1051.00000 388.00000
937.00000 351.00000
1171.00000 241.00000
1178.00000 196.00000
1208.00000 217.00000
IMAGE=Paffaff_bratiya5c.tif
ID=affaffbra5
LM=13
643.00000 793.00000
832.00000 751.00000
892.00000 178.00000
903.00000 265.00000
794.00000 521.00000
655.00000 508.00000
819.00000 646.00000
636.00000 650.00000
813.00000 363.00000
723.00000 312.00000
961.00000 263.00000
978.00000 224.00000
1001.00000 253.00000
IMAGE=Paffaff_bratiya6c.tif
ID=affaffbra6
LM=13
854.00000 707.00000
1095.00000 647.00000
1148.00000 87.00000
1147.00000 158.00000
1052.00000 423.00000
882.00000 412.00000
1066.00000 542.00000
850.00000 546.00000
1066.00000 266.00000
970.00000 195.00000
1208.00000 155.00000
1219.00000 129.00000
1244.00000 149.00000
IMAGE=Paffaff_bratiya7c.tif
ID=affaffbra7
LM=13
630.00000 806.00000
836.00000 754.00000
867.00000 148.00000
877.00000 233.00000
770.00000 507.00000
637.00000 507.00000
797.00000 645.00000
629.00000 660.00000
789.00000 335.00000
697.00000 276.00000
931.00000 216.00000
951.00000 184.00000
976.00000 208.00000
IMAGE=Paffaff_kirilova1c.tif
ID=affaffkir1
LM=13
703.00000 759.00000
915.00000 722.00000
970.00000 114.00000
976.00000 184.00000
871.00000 502.00000
727.00000 497.00000
891.00000 617.00000
715.00000 629.00000
888.00000 311.00000
783.00000 277.00000
1031.00000 172.00000
1044.00000 143.00000
1069.00000 170.00000
IMAGE=Paffaff_kirilova2c.tif
ID=affaffkir2
LM=13
627.00000 750.00000
792.00000 698.00000
840.00000 164.00000
850.00000 229.00000
767.00000 489.00000
636.00000 485.00000
778.00000 599.00000
618.00000 604.00000
784.00000 344.00000
687.00000 293.00000
912.00000 200.00000
915.00000 170.00000
945.00000 189.00000
IMAGE=Paffaff_osogovo1c.tif
ID=affaffoso1
LM=13
819.00000 892.00000
935.00000 885.00000
1008.00000 235.00000
1017.00000 312.00000
947.00000 627.00000
815.00000 624.00000
953.00000 769.00000
809.00000 764.00000
949.00000 462.00000
837.00000 431.00000
1074.00000 298.00000
1090.00000 266.00000
1111.00000 293.00000
IMAGE=Paffaff_osogovo2c.tif
ID=affaffoso2
LM=13
706.00000 826.00000
878.00000 726.00000
872.00000 132.00000
881.00000 199.00000
816.00000 505.00000
675.00000 514.00000
847.00000 619.00000
664.00000 645.00000
815.00000 349.00000
700.00000 327.00000
941.00000 183.00000
950.00000 155.00000
968.00000 172.00000
IMAGE=Paffaff_osogovo3c.tif
ID=affaffoso3
LM=13
749.00000 695.00000
938.00000 644.00000
976.00000 106.00000
980.00000 171.00000
883.00000 429.00000
757.00000 421.00000
900.00000 555.00000
745.00000 565.00000
900.00000 285.00000
804.00000 258.00000
1041.00000 159.00000
1048.00000 132.00000
1071.00000 150.00000
IMAGE=Paffaff_osogovo4c.tif
ID=affaffoso4
LM=13
628.00000 854.00000
850.00000 855.00000
906.00000 199.00000
911.00000 268.00000
811.00000 563.00000
670.00000 551.00000
819.00000 709.00000
641.00000 713.00000
830.00000 382.00000
741.00000 340.00000
961.00000 265.00000
971.00000 240.00000
989.00000 262.00000
IMAGE=Paffaff_osogovo5c.tif
ID=affaffoso5
LM=13
831.00000 647.00000
1023.00000 619.00000
1096.00000 58.00000
1104.00000 127.00000
1012.00000 377.00000
873.00000 373.00000
1010.00000 510.00000
842.00000 513.00000
1035.00000 242.00000
942.00000 172.00000
1172.00000 102.00000
1172.00000 73.00000
1202.00000 91.00000
IMAGE=Paffaff_osogovo6c.tif
ID=affaffoso6
LM=13
762.00000 713.00000
973.00000 674.00000
1001.00000 146.00000
1009.00000 220.00000
924.00000 468.00000
792.00000 468.00000
945.00000 582.00000
775.00000 590.00000
935.00000 329.00000
848.00000 276.00000
1067.00000 209.00000
1071.00000 176.00000
1095.00000 202.00000
IMAGE=Paffaff_osogovo7c.tif
ID=affaffoso7
LM=13
698.00000 772.00000
860.00000 671.00000
887.00000 148.00000
896.00000 212.00000
805.00000 470.00000
695.00000 474.00000
814.00000 591.00000
686.00000 609.00000
819.00000 330.00000
743.00000 297.00000
942.00000 194.00000
941.00000 162.00000
978.00000 179.00000
IMAGE=Paffaff_osogovo8c.tif
ID=affaffoso8
LM=13
557.00000 840.00000
796.00000 752.00000
733.00000 144.00000
750.00000 211.00000
716.00000 532.00000
573.00000 544.00000
753.00000 655.00000
560.00000 680.00000
701.00000 363.00000
594.00000 343.00000
799.00000 173.00000
798.00000 144.00000
820.00000 146.00000
IMAGE=Paffaff_pirin1c.tif
ID=affaffpir1
LM=13
580.00000 756.00000
809.00000 725.00000
883.00000 177.00000
893.00000 253.00000
779.00000 509.00000
634.00000 496.00000
784.00000 631.00000
596.00000 631.00000
806.00000 367.00000
697.00000 313.00000
964.00000 235.00000
968.00000 206.00000
993.00000 220.00000
IMAGE=paffaff_pirin2c.tif
ID=affaffpir2
LM=13
574.00000 673.00000
790.00000 608.00000
831.00000 54.00000
838.00000 123.00000
747.00000 390.00000
609.00000 387.00000
757.00000 508.00000
592.00000 523.00000
759.00000 233.00000
662.00000 201.00000
901.00000 108.00000
912.00000 84.00000
930.00000 96.00000
IMAGE=Paffaff_pirin3c.tif
ID=affaffpir3
LM=13
604.00000 807.00000
839.00000 743.00000
839.00000 106.00000
846.00000 174.00000
758.00000 508.00000
612.00000 516.00000
793.00000 649.00000
600.00000 676.00000
749.00000 327.00000
637.00000 291.00000
919.00000 156.00000
924.00000 124.00000
953.00000 145.00000
IMAGE=Paffaff_pirin4c.tif
ID=affaffpir4
LM=13
827.00000 761.00000
1028.00000 700.00000
1026.00000 103.00000
1031.00000 184.00000
963.00000 462.00000
820.00000 472.00000
988.00000 594.00000
815.00000 609.00000
963.00000 316.00000
859.00000 278.00000
1109.00000 160.00000
1119.00000 133.00000
1140.00000 158.00000
IMAGE=Paffaff_rila11c.tif
ID=affaffril11
LM=13
803.00000 706.00000
994.00000 639.00000
1007.00000 108.00000
1009.00000 158.00000
947.00000 439.00000
805.00000 442.00000
969.00000 553.00000
796.00000 578.00000
942.00000 292.00000
844.00000 255.00000
1077.00000 138.00000
1078.00000 116.00000
1094.00000 126.00000
IMAGE=Paffaff_rila12c.tif
ID=affaffril12
LM=13
772.00000 796.00000
965.00000 674.00000
982.00000 83.00000
989.00000 150.00000
908.00000 448.00000
769.00000 451.00000
935.00000 575.00000
760.00000 590.00000
911.00000 292.00000
810.00000 248.00000
1063.00000 133.00000
1068.00000 106.00000
1088.00000 118.00000
IMAGE=Paffaff_rila5c.tif
ID=affaffril5
LM=13
824.00000 887.00000
1033.00000 800.00000
1068.00000 212.00000
1073.00000 281.00000
968.00000 557.00000
835.00000 547.00000
992.00000 695.00000
816.00000 710.00000
993.00000 402.00000
900.00000 352.00000
1136.00000 260.00000
1144.00000 232.00000
1165.00000 242.00000
IMAGE=Paffaff_rila6c.tif
ID=affaffril6
LM=13
820.00000 827.00000
1035.00000 794.00000
1068.00000 170.00000
1073.00000 252.00000
982.00000 549.00000
841.00000 548.00000
1001.00000 684.00000
817.00000 679.00000
991.00000 392.00000
885.00000 349.00000
1147.00000 235.00000
1160.00000 205.00000
1186.00000 228.00000
IMAGE=Paffaff_rila7c.tif
ID=affaffril7
LM=13
846.00000 741.00000
1068.00000 720.00000
1094.00000 108.00000
1100.00000 177.00000
1014.00000 485.00000
879.00000 481.00000
1038.00000 614.00000
858.00000 618.00000
1017.00000 302.00000
916.00000 270.00000
1164.00000 167.00000
1177.00000 138.00000
1197.00000 158.00000
IMAGE=Paffaff_rila8c.tif
ID=affaffril8
LM=13
696.00000 727.00000
922.00000 633.00000
913.00000 41.00000
924.00000 108.00000
865.00000 419.00000
711.00000 422.00000
895.00000 539.00000
703.00000 554.00000
851.00000 256.00000
742.00000 242.00000
981.00000 84.00000
986.00000 56.00000
1012.00000 74.00000
IMAGE=Paffaff_rila9c.tif
ID=affaffril9
LM=13
664.00000 688.00000
901.00000 674.00000
927.00000 41.00000
935.00000 117.00000
839.00000 398.00000
694.00000 398.00000
879.00000 546.00000
680.00000 540.00000
851.00000 238.00000
742.00000 201.00000
1014.00000 102.00000
1027.00000 76.00000
1047.00000 87.00000
IMAGE=Paffaff_stapla2c.jpg
ID=affaffsta2
LM=13
648.00000 693.00000
776.00000 678.00000
786.00000 371.00000
786.00000 416.00000
748.00000 555.00000
671.00000 549.00000
749.00000 617.00000
656.00000 612.00000
754.00000 475.00000
700.00000 447.00000
825.00000 417.00000
837.00000 399.00000
842.00000 416.00000
IMAGE=Paffdin_susica1c.tif
ID=affdinsus1
LM=13
640.00000 753.00000
880.00000 725.00000
883.00000 181.00000
890.00000 256.00000
801.00000 506.00000
671.00000 497.00000
828.00000 637.00000
651.00000 643.00000
815.00000 351.00000
734.00000 308.00000
957.00000 242.00000
969.00000 209.00000
991.00000 232.00000
IMAGE=Paffhaj_hajla1c.tif
ID=affhajhaj1
LM=13
714.00000 719.00000
875.00000 617.00000
887.00000 124.00000
893.00000 190.00000
813.00000 426.00000
703.00000 430.00000
842.00000 537.00000
697.00000 558.00000
820.00000 295.00000
736.00000 264.00000
948.00000 170.00000
953.00000 143.00000
968.00000 159.00000
IMAGE=Paffhaj_hajla3c.tif
ID=affhajhaj3
LM=13
583.00000 680.00000
771.00000 667.00000
839.00000 114.00000
843.00000 189.00000
718.00000 419.00000
605.00000 410.00000
736.00000 548.00000
588.00000 551.00000
752.00000 268.00000
673.00000 217.00000
909.00000 179.00000
918.00000 154.00000
935.00000 175.00000
IMAGE=Paffhaj_hajla5c.tif
ID=affhajhaj5
LM=13
610.00000 764.00000
788.00000 693.00000
802.00000 177.00000
809.00000 245.00000
728.00000 500.00000
609.00000 504.00000
757.00000 618.00000
601.00000 639.00000
741.00000 366.00000
639.00000 336.00000
880.00000 218.00000
884.00000 191.00000
907.00000 209.00000
IMAGE=Paffhaj_hajla6c.tif
ID=affhajhaj6
LM=13
464.00000 946.00000
742.00000 893.00000
740.00000 71.00000
752.00000 181.00000
654.00000 551.00000
474.00000 549.00000
685.00000 735.00000
473.00000 750.00000
661.00000 358.00000
510.00000 332.00000
814.00000 154.00000
830.00000 115.00000
857.00000 125.00000
IMAGE=Paffkom_golije1c.jpg
ID=affkomgol1
LM=13
306.00000 871.00000
587.00000 855.00000
735.00000 56.00000
740.00000 144.00000
565.00000 515.00000
407.00000 491.00000
557.00000 709.00000
348.00000 692.00000
606.00000 298.00000
496.00000 241.00000
814.00000 140.00000
839.00000 97.00000
858.00000 130.00000
IMAGE=Paffkom_luc1c.tif
ID=affkomluc1
LM=13
797.00000 870.00000
944.00000 679.00000
321.00000 105.00000
407.00000 147.00000
659.00000 515.00000
544.00000 634.00000
808.00000 602.00000
678.00000 766.00000
466.00000 344.00000
366.00000 436.00000
425.00000 111.00000
389.00000 64.00000
435.00000 40.00000
IMAGE=Paffkom_Luc3c.tif
ID=affkomluc3
LM=13
555.00000 914.00000
777.00000 813.00000
774.00000 39.00000
779.00000 115.00000
672.00000 489.00000
526.00000 498.00000
731.00000 674.00000
531.00000 720.00000
682.00000 271.00000
574.00000 232.00000
832.00000 103.00000
854.00000 61.00000
878.00000 80.00000
IMAGE=Paffkom_Luc4c.tif
ID=affkomluc4
LM=13
566.00000 967.00000
854.00000 979.00000
924.00000 33.00000
938.00000 149.00000
806.00000 592.00000
627.00000 577.00000
813.00000 793.00000
594.00000 785.00000
833.00000 368.00000
675.00000 343.00000
1018.00000 107.00000
1026.00000 62.00000
1058.00000 77.00000
IMAGE=Paffkom_ulcinj1c.jpg
ID=affkomulc1
LM=13
349.00000 933.00000
626.00000 899.00000
643.00000 34.00000
658.00000 141.00000
548.00000 533.00000
387.00000 528.00000
574.00000 723.00000
365.00000 723.00000
559.00000 311.00000
420.00000 278.00000
735.00000 108.00000
745.00000 55.00000
779.00000 67.00000
IMAGE=Paffkom_ulcinj2c.jpg
ID=affkomulc2
LM=13
512.00000 837.00000
753.00000 739.00000
743.00000 91.00000
759.00000 190.00000
674.00000 488.00000
534.00000 492.00000
707.00000 633.00000
516.00000 656.00000
682.00000 323.00000
568.00000 293.00000
820.00000 177.00000
834.00000 138.00000
867.00000 166.00000
IMAGE=Paffrum_kolasin10c.tif
ID=affrumkol10
LM=13
509.00000 764.00000
747.00000 680.00000
718.00000 54.00000
727.00000 124.00000
672.00000 431.00000
536.00000 433.00000
687.00000 558.00000
530.00000 574.00000
670.00000 281.00000
567.00000 257.00000
761.00000 107.00000
778.00000 68.00000
798.00000 89.00000
IMAGE=Paffrum_kolasin11c.tif
ID=affrumkol11
LM=13
582.00000 802.00000
792.00000 712.00000
810.00000 57.00000
811.00000 130.00000
721.00000 461.00000
577.00000 460.00000
747.00000 598.00000
569.00000 613.00000
725.00000 279.00000
612.00000 232.00000
856.00000 124.00000
874.00000 90.00000
895.00000 105.00000
IMAGE=Paffrum_kolasin12c.tif
ID=affrumkol12
LM=13
497.00000 918.00000
738.00000 844.00000
755.00000 154.00000
760.00000 232.00000
672.00000 570.00000
520.00000 566.00000
693.00000 726.00000
503.00000 743.00000
678.00000 382.00000
562.00000 352.00000
810.00000 218.00000
815.00000 172.00000
848.00000 194.00000
IMAGE=Paffrum_kolasin1c.tif
ID=affrumkol1
LM=13
530.00000 805.00000
730.00000 775.00000
749.00000 118.00000
751.00000 191.00000
668.00000 503.00000
528.00000 505.00000
690.00000 642.00000
531.00000 653.00000
676.00000 328.00000
558.00000 293.00000
812.00000 176.00000
810.00000 141.00000
849.00000 157.00000
IMAGE=Paffrum_kolasin2c.tif
ID=affrumkol2
LM=13
511.00000 732.00000
743.00000 782.00000
846.00000 118.00000
853.00000 202.00000
714.00000 475.00000
583.00000 451.00000
711.00000 626.00000
541.00000 603.00000
752.00000 309.00000
665.00000 236.00000
906.00000 194.00000
926.00000 156.00000
951.00000 182.00000
IMAGE=Paffrum_kolasin3c.tif
ID=affrumkol3
LM=13
542.00000 850.00000
767.00000 773.00000
829.00000 132.00000
833.00000 213.00000
721.00000 505.00000
583.00000 504.00000
741.00000 650.00000
559.00000 660.00000
743.00000 326.00000
636.00000 272.00000
887.00000 200.00000
899.00000 167.00000
918.00000 187.00000
IMAGE=Paffrum_kolasin4c.tif
ID=affrumkol4
LM=13
392.00000 699.00000
615.00000 713.00000
752.00000 83.00000
762.00000 172.00000
617.00000 451.00000
474.00000 419.00000
605.00000 585.00000
433.00000 562.00000
664.00000 297.00000
566.00000 226.00000
819.00000 168.00000
843.00000 131.00000
873.00000 165.00000
IMAGE=Paffrum_kolasin5c.tif
ID=affrumkol5
LM=13
469.00000 853.00000
740.00000 819.00000
843.00000 209.00000
846.00000 293.00000
698.00000 556.00000
559.00000 533.00000
696.00000 692.00000
514.00000 678.00000
743.00000 396.00000
659.00000 321.00000
896.00000 292.00000
932.00000 259.00000
948.00000 295.00000
IMAGE=Paffrum_kolasin6c.tif
ID=affrumkol6
LM=13
455.00000 795.00000
699.00000 725.00000
857.00000 100.00000
856.00000 183.00000
689.00000 464.00000
562.00000 430.00000
673.00000 611.00000
504.00000 594.00000
745.00000 292.00000
661.00000 241.00000
929.00000 194.00000
959.00000 164.00000
979.00000 194.00000
IMAGE=Paffrum_kolasin7c.tif
ID=affrumkol7
LM=13
566.00000 748.00000
784.00000 754.00000
870.00000 50.00000
883.00000 148.00000
748.00000 455.00000
606.00000 448.00000
757.00000 610.00000
582.00000 595.00000
788.00000 258.00000
677.00000 199.00000
943.00000 135.00000
959.00000 100.00000
991.00000 130.00000
IMAGE=Paffrum_kolasin8c.tif
ID=affrumkol8
LM=13
543.00000 790.00000
752.00000 743.00000
796.00000 175.00000
807.00000 260.00000
731.00000 520.00000
598.00000 512.00000
734.00000 651.00000
573.00000 635.00000
741.00000 370.00000
651.00000 305.00000
856.00000 241.00000
869.00000 201.00000
901.00000 228.00000
IMAGE=Paffrum_kolasin9c.tif
ID=affrumkol9
LM=13
527.00000 667.00000
754.00000 596.00000
804.00000 104.00000
805.00000 171.00000
716.00000 383.00000
585.00000 364.00000
712.00000 490.00000
558.00000 488.00000
741.00000 258.00000
662.00000 204.00000
867.00000 151.00000
874.00000 123.00000
898.00000 142.00000
IMAGE=Paffser_ljuboten10c.tif
ID=affserlju10
LM=13
377.00000 660.00000
569.00000 619.00000
577.00000 133.00000
587.00000 209.00000
504.00000 414.00000
390.00000 403.00000
528.00000 525.00000
378.00000 537.00000
525.00000 294.00000
437.00000 248.00000
670.00000 188.00000
672.00000 159.00000
698.00000 173.00000
IMAGE=Paffser_ljuboten14c.tif
ID=affserlju14
LM=13
553.00000 681.00000
745.00000 632.00000
742.00000 120.00000
751.00000 185.00000
691.00000 424.00000
549.00000 420.00000
703.00000 544.00000
544.00000 546.00000
694.00000 287.00000
584.00000 252.00000
800.00000 163.00000
796.00000 131.00000
831.00000 146.00000
IMAGE=Paffser_ljuboten16c.tif
ID=affserlju16
LM=13
639.00000 734.00000
845.00000 701.00000
922.00000 236.00000
931.00000 310.00000
822.00000 493.00000
697.00000 467.00000
821.00000 610.00000
655.00000 601.00000
853.00000 387.00000
777.00000 331.00000
987.00000 291.00000
995.00000 257.00000
1029.00000 282.00000
IMAGE=Paffser_ljuboten19c.tif
ID=affserlju19
LM=13
510.00000 693.00000
714.00000 652.00000
770.00000 133.00000
772.00000 208.00000
670.00000 434.00000
541.00000 420.00000
683.00000 554.00000
514.00000 553.00000
692.00000 305.00000
598.00000 260.00000
843.00000 202.00000
853.00000 172.00000
869.00000 191.00000
IMAGE=Paffser_ljuboten1c.tif
ID=affserlju1
LM=13
625.00000 735.00000
816.00000 625.00000
792.00000 68.00000
801.00000 142.00000
723.00000 394.00000
593.00000 395.00000
754.00000 522.00000
592.00000 543.00000
730.00000 258.00000
636.00000 218.00000
849.00000 112.00000
848.00000 81.00000
874.00000 96.00000
IMAGE=Paffser_ljuboten20c.tif
ID=affserlju20
LM=13
541.00000 776.00000
728.00000 763.00000
803.00000 187.00000
813.00000 261.00000
716.00000 513.00000
584.00000 504.00000
731.00000 642.00000
557.00000 633.00000
730.00000 363.00000
639.00000 324.00000
869.00000 243.00000
873.00000 205.00000
906.00000 226.00000
IMAGE=Paffser_ljuboten2c.tif
ID=affserlju2
LM=13
520.00000 781.00000
696.00000 733.00000
724.00000 222.00000
729.00000 282.00000
632.00000 501.00000
524.00000 493.00000
658.00000 626.00000
509.00000 634.00000
659.00000 368.00000
584.00000 322.00000
791.00000 266.00000
795.00000 238.00000
822.00000 254.00000
IMAGE=Paffser_ljuboten3c.tif
ID=affserlju3
LM=13
650.00000 780.00000
797.00000 710.00000
762.00000 193.00000
768.00000 249.00000
713.00000 510.00000
592.00000 520.00000
746.00000 622.00000
611.00000 658.00000
705.00000 364.00000
610.00000 347.00000
817.00000 237.00000
827.00000 210.00000
842.00000 224.00000
IMAGE=Paffser_ljuboten4c.tif
ID=affserlju4
LM=13
539.00000 806.00000
752.00000 747.00000
787.00000 183.00000
790.00000 242.00000
687.00000 509.00000
552.00000 497.00000
711.00000 637.00000
535.00000 641.00000
707.00000 349.00000
617.00000 311.00000
847.00000 230.00000
853.00000 207.00000
876.00000 220.00000
IMAGE=Paffser_ljuboten5c.tif
ID=affserlju5
LM=13
531.00000 825.00000
721.00000 740.00000
763.00000 207.00000
772.00000 275.00000
665.00000 506.00000
531.00000 500.00000
675.00000 632.00000
527.00000 642.00000
689.00000 349.00000
602.00000 308.00000
827.00000 262.00000
827.00000 233.00000
854.00000 250.00000
IMAGE=Paffser_ljuboten6c.tif
ID=affserlju6
LM=13
380.00000 728.00000
568.00000 668.00000
608.00000 154.00000
610.00000 219.00000
517.00000 441.00000
400.00000 437.00000
527.00000 565.00000
382.00000 577.00000
537.00000 311.00000
457.00000 264.00000
666.00000 207.00000
681.00000 180.00000
696.00000 196.00000
IMAGE=Paffser_ljuboten7c.tif
ID=affserlju7
LM=13
627.00000 669.00000
849.00000 596.00000
849.00000 67.00000
857.00000 152.00000
793.00000 388.00000
650.00000 378.00000
813.00000 509.00000
628.00000 518.00000
805.00000 247.00000
708.00000 206.00000
934.00000 114.00000
935.00000 95.00000
946.00000 107.00000
IMAGE=Paffser_ljuboten8c.tif
ID=affserlju8
LM=13
412.00000 797.00000
593.00000 714.00000
615.00000 176.00000
622.00000 242.00000
530.00000 493.00000
410.00000 491.00000
548.00000 608.00000
401.00000 618.00000
545.00000 356.00000
453.00000 321.00000
676.00000 229.00000
686.00000 200.00000
705.00000 215.00000
IMAGE=Paffser_ljuboten9c.tif
ID=affserlju9
LM=13
647.00000 679.00000
883.00000 664.00000
911.00000 147.00000
925.00000 235.00000
823.00000 438.00000
663.00000 429.00000
839.00000 555.00000
640.00000 564.00000
853.00000 314.00000
738.00000 254.00000
1059.00000 219.00000
1068.00000 194.00000
1087.00000 210.00000
IMAGE=Phoelze_nidzhe3c.jpg
ID=hoelzenid3
LM=13
539.00000 650.00000
807.00000 597.00000
801.00000 90.00000
808.00000 171.00000
739.00000 394.00000
584.00000 388.00000
763.00000 507.00000
566.00000 510.00000
737.00000 265.00000
630.00000 224.00000
933.00000 154.00000
945.00000 133.00000
956.00000 146.00000
IMAGE=Phoelze_nidzhe4c.jpg
ID=hoelzenid4
LM=13
541.00000 787.00000
818.00000 699.00000
782.00000 114.00000
800.00000 214.00000
745.00000 453.00000
549.00000 461.00000
780.00000 583.00000
538.00000 624.00000
741.00000 314.00000
613.00000 259.00000
936.00000 193.00000
944.00000 157.00000
965.00000 180.00000
IMAGE=Phoelze_nidzhe5c.jpg
ID=hoelzenid5
LM=13
500.00000 716.00000
824.00000 680.00000
840.00000 112.00000
853.00000 205.00000
749.00000 457.00000
568.00000 442.00000
768.00000 581.00000
528.00000 573.00000
772.00000 294.00000
659.00000 231.00000
987.00000 201.00000
996.00000 165.00000
1005.00000 189.00000
IMAGE=Phoelze_nidzhe7c.jpg
ID=hoelzenid7
LM=13
471.00000 763.00000
769.00000 653.00000
771.00000 78.00000
781.00000 164.00000
693.00000 419.00000
523.00000 412.00000
717.00000 530.00000
480.00000 556.00000
700.00000 261.00000
595.00000 220.00000
916.00000 162.00000
924.00000 138.00000
940.00000 154.00000
IMAGE=Phoelze_nidzhe8c.jpg
ID=hoelzenid8
LM=13
435.00000 812.00000
722.00000 719.00000
717.00000 151.00000
721.00000 234.00000
607.00000 489.00000
446.00000 493.00000
663.00000 610.00000
428.00000 656.00000
612.00000 339.00000
505.00000 293.00000
831.00000 221.00000
839.00000 198.00000
855.00000 207.00000
IMAGE=Phoelze_nidzhe9c.jpg
ID=hoelzenid9
LM=13
533.00000 642.00000
700.00000 593.00000
790.00000 92.00000
791.00000 181.00000
667.00000 378.00000
542.00000 369.00000
662.00000 496.00000
525.00000 496.00000
705.00000 258.00000
614.00000 192.00000
858.00000 157.00000
875.00000 125.00000
922.00000 157.00000
IMAGE=Pjablan_jablanica1c.jpg
ID=jablanjab1
LM=13
605.00000 791.00000
757.00000 742.00000
875.00000 260.00000
881.00000 351.00000
747.00000 524.00000
625.00000 497.00000
736.00000 641.00000
605.00000 637.00000
799.00000 420.00000
711.00000 342.00000
945.00000 325.00000
949.00000 279.00000
996.00000 305.00000
IMAGE=Pjablan_jablanica4c.jpg
ID=jablanjab4
LM=13
622.00000 733.00000
758.00000 716.00000
899.00000 284.00000
894.00000 365.00000
762.00000 521.00000
651.00000 497.00000
753.00000 626.00000
627.00000 622.00000
814.00000 420.00000
740.00000 349.00000
957.00000 348.00000
961.00000 301.00000
1006.00000 347.00000
IMAGE=Pjablan_jablanica5c.jpg
ID=jablanjab5
LM=13
540.00000 671.00000
776.00000 616.00000
793.00000 227.00000
804.00000 312.00000
738.00000 456.00000
591.00000 438.00000
750.00000 536.00000
568.00000 532.00000
752.00000 363.00000
673.00000 294.00000
868.00000 294.00000
874.00000 248.00000
895.00000 288.00000
IMAGE=Pnobili_lalas2c.jpg
ID=nobililal2
LM=13
771.00000 753.00000
989.00000 690.00000
1001.00000 270.00000
1006.00000 362.00000
936.00000 519.00000
792.00000 515.00000
951.00000 612.00000
775.00000 630.00000
950.00000 422.00000
852.00000 365.00000
1056.00000 341.00000
1068.00000 306.00000
1084.00000 327.00000
IMAGE=Pnobili_mitinas1c.jpg
ID=nobilimit1
LM=13
747.00000 568.00000
976.00000 510.00000
991.00000 131.00000
988.00000 218.00000
910.00000 353.00000
779.00000 348.00000
929.00000 432.00000
756.00000 440.00000
924.00000 259.00000
849.00000 201.00000
1061.00000 210.00000
1087.00000 183.00000
1094.00000 206.00000
IMAGE=Pnobili_nemea1c.jpg
ID=nobilinem1
LM=13
439.00000 718.00000
637.00000 653.00000
648.00000 153.00000
655.00000 233.00000
589.00000 454.00000
464.00000 451.00000
603.00000 561.00000
446.00000 565.00000
597.00000 328.00000
507.00000 294.00000
746.00000 224.00000
761.00000 197.00000
769.00000 218.00000
IMAGE=Pnonvei_susica10c.tif
ID=nonveisus10
LM=13
695.00000 810.00000
895.00000 787.00000
889.00000 341.00000
894.00000 416.00000
841.00000 611.00000
718.00000 600.00000
855.00000 707.00000
699.00000 710.00000
842.00000 495.00000
755.00000 458.00000
963.00000 405.00000
970.00000 385.00000
992.00000 399.00000
IMAGE=Pnonvei_susica11c.tif
ID=nonveisus11
LM=13
508.00000 707.00000
722.00000 617.00000
742.00000 94.00000
744.00000 173.00000
661.00000 411.00000
531.00000 405.00000
679.00000 534.00000
504.00000 545.00000
679.00000 275.00000
575.00000 234.00000
818.00000 168.00000
831.00000 141.00000
841.00000 166.00000
IMAGE=Pnonvei_susica12c.tif
ID=nonveisus12
LM=13
520.00000 902.00000
715.00000 819.00000
666.00000 337.00000
673.00000 399.00000
643.00000 624.00000
518.00000 630.00000
662.00000 726.00000
516.00000 749.00000
631.00000 497.00000
543.00000 474.00000
731.00000 380.00000
735.00000 361.00000
753.00000 373.00000
IMAGE=Pnonvei_susica1c.tif
ID=nonveisus1
LM=13
637.00000 748.00000
805.00000 689.00000
851.00000 192.00000
852.00000 263.00000
779.00000 477.00000
657.00000 474.00000
792.00000 585.00000
644.00000 590.00000
789.00000 345.00000
710.00000 308.00000
937.00000 261.00000
943.00000 248.00000
958.00000 259.00000
IMAGE=Pnonvei_susica2c.tif
ID=nonveisus2
LM=13
574.00000 717.00000
820.00000 654.00000
745.00000 151.00000
759.00000 217.00000
712.00000 423.00000
592.00000 435.00000
746.00000 551.00000
583.00000 578.00000
717.00000 302.00000
621.00000 294.00000
827.00000 190.00000
826.00000 175.00000
842.00000 182.00000
IMAGE=Pnonvei_susica3c.tif
ID=nonveisus3
LM=13
558.00000 707.00000
772.00000 618.00000
696.00000 132.00000
706.00000 197.00000
673.00000 430.00000
543.00000 431.00000
699.00000 535.00000
535.00000 562.00000
662.00000 305.00000
567.00000 285.00000
754.00000 186.00000
765.00000 162.00000
775.00000 177.00000
IMAGE=Pnonvei_susica4c.tif
ID=nonveisus4
LM=13
629.00000 660.00000
831.00000 618.00000
805.00000 142.00000
810.00000 211.00000
764.00000 433.00000
642.00000 437.00000
785.00000 532.00000
628.00000 544.00000
754.00000 303.00000
666.00000 278.00000
874.00000 198.00000
886.00000 177.00000
901.00000 193.00000
IMAGE=Pnonvei_susica5c.tif
ID=nonveisus5
LM=13
615.00000 682.00000
820.00000 658.00000
788.00000 179.00000
793.00000 235.00000
763.00000 470.00000
622.00000 466.00000
788.00000 568.00000
618.00000 574.00000
746.00000 341.00000
648.00000 317.00000
860.00000 230.00000
862.00000 214.00000
874.00000 220.00000
IMAGE=Pnonvei_susica6c.tif
ID=nonveisus6
LM=13
579.00000 797.00000
790.00000 712.00000
786.00000 202.00000
794.00000 274.00000
727.00000 502.00000
593.00000 504.00000
746.00000 621.00000
580.00000 639.00000
730.00000 373.00000
625.00000 349.00000
863.00000 255.00000
871.00000 229.00000
891.00000 247.00000
IMAGE=Pnonvei_susica9c.tif
ID=nonveisus9
LM=13
576.00000 862.00000
858.00000 845.00000
892.00000 173.00000
894.00000 267.00000
790.00000 553.00000
601.00000 541.00000
813.00000 709.00000
583.00000 708.00000
807.00000 391.00000
675.00000 333.00000
938.00000 234.00000
950.00000 201.00000
975.00000 212.00000
IMAGE=Pobesus_loanina10c.jpg
ID=obesusloa10
LM=13
590.00000 794.00000
848.00000 781.00000
899.00000 171.00000
902.00000 247.00000
807.00000 518.00000
629.00000 501.00000
822.00000 652.00000
617.00000 656.00000
825.00000 371.00000
697.00000 303.00000
925.00000 225.00000
935.00000 183.00000
962.00000 201.00000
IMAGE=Pobesus_loanina11c.jpg
ID=obesusloa11
LM=13
582.00000 697.00000
818.00000 696.00000
926.00000 121.00000
929.00000 212.00000
795.00000 457.00000
635.00000 439.00000
802.00000 578.00000
606.00000 570.00000
832.00000 307.00000
727.00000 236.00000
970.00000 184.00000
984.00000 147.00000
1003.00000 169.00000
IMAGE=Pobesus_loanina12c.jpg
ID=obesusloa12
LM=13
646.00000 712.00000
918.00000 703.00000
1003.00000 88.00000
1003.00000 180.00000
868.00000 442.00000
698.00000 416.00000
874.00000 573.00000
666.00000 567.00000
911.00000 290.00000
796.00000 212.00000
1053.00000 158.00000
1068.00000 113.00000
1092.00000 135.00000
IMAGE=Pobesus_loanina13c.jpg
ID=obesusloa13
LM=13
475.00000 812.00000
735.00000 827.00000
803.00000 130.00000
802.00000 232.00000
676.00000 544.00000
494.00000 530.00000
708.00000 690.00000
488.00000 682.00000
694.00000 381.00000
555.00000 306.00000
867.00000 195.00000
888.00000 158.00000
902.00000 175.00000
IMAGE=Pobesus_loanina15c.jpg
ID=obesusloa15
LM=13
620.00000 804.00000
858.00000 790.00000
930.00000 183.00000
939.00000 279.00000
829.00000 534.00000
653.00000 521.00000
844.00000 669.00000
632.00000 670.00000
859.00000 383.00000
723.00000 315.00000
986.00000 245.00000
997.00000 209.00000
1011.00000 224.00000
IMAGE=Pobesus_loanina3c.jpg
ID=obesusloa3
LM=13
441.00000 752.00000
695.00000 814.00000
833.00000 159.00000
840.00000 266.00000
694.00000 526.00000
517.00000 495.00000
697.00000 678.00000
482.00000 639.00000
749.00000 376.00000
625.00000 276.00000
892.00000 235.00000
920.00000 199.00000
938.00000 216.00000
IMAGE=Pobesus_loanina4c.jpg
ID=obesusloa4
LM=13
544.00000 776.00000
798.00000 753.00000
868.00000 140.00000
878.00000 234.00000
743.00000 487.00000
578.00000 467.00000
753.00000 627.00000
560.00000 626.00000
783.00000 345.00000
669.00000 255.00000
916.00000 206.00000
932.00000 165.00000
953.00000 185.00000
IMAGE=Pobesus_loanina5c.jpg
ID=obesusloa5
LM=13
660.00000 690.00000
903.00000 674.00000
938.00000 73.00000
938.00000 155.00000
843.00000 432.00000
677.00000 427.00000
875.00000 560.00000
677.00000 556.00000
859.00000 276.00000
732.00000 225.00000
978.00000 123.00000
980.00000 86.00000
1007.00000 99.00000
IMAGE=Pobesus_loanina6c.jpg
ID=obesusloa6
LM=13
587.00000 709.00000
842.00000 713.00000
902.00000 126.00000
908.00000 218.00000
799.00000 474.00000
642.00000 457.00000
803.00000 594.00000
617.00000 580.00000
824.00000 321.00000
707.00000 262.00000
953.00000 188.00000
962.00000 150.00000
982.00000 170.00000
IMAGE=Pobesus_loanina7c.jpg
ID=obesusloa7
LM=13
455.00000 814.00000
710.00000 805.00000
775.00000 227.00000
779.00000 322.00000
675.00000 556.00000
513.00000 541.00000
690.00000 692.00000
480.00000 682.00000
706.00000 419.00000
598.00000 336.00000
832.00000 294.00000
845.00000 256.00000
876.00000 278.00000
IMAGE=Pobesus_loanina8c.jpg
ID=obesusloa8
LM=13
633.00000 734.00000
889.00000 706.00000
922.00000 77.00000
920.00000 177.00000
831.00000 440.00000
649.00000 440.00000
852.00000 584.00000
646.00000 588.00000
841.00000 301.00000
712.00000 226.00000
966.00000 141.00000
982.00000 97.00000
1003.00000 119.00000
IMAGE=Pobesus_loanina9c.jpg
ID=obesusloa9
LM=13
664.00000 546.00000
873.00000 564.00000
835.00000 73.00000
844.00000 140.00000
812.00000 367.00000
682.00000 362.00000
837.00000 470.00000
676.00000 457.00000
806.00000 239.00000
707.00000 215.00000
887.00000 105.00000
890.00000 76.00000
911.00000 81.00000
IMAGE=Ppoecil_popova10c.tif
ID=poecilpop10
LM=13
624.00000 679.00000
861.00000 636.00000
896.00000 58.00000
901.00000 125.00000
801.00000 401.00000
653.00000 391.00000
811.00000 522.00000
635.00000 527.00000
811.00000 252.00000
703.00000 208.00000
955.00000 113.00000
960.00000 87.00000
991.00000 109.00000
IMAGE=Ppoecil_popova13c.tif
ID=poecilpop13
LM=13
760.00000 821.00000
963.00000 794.00000
962.00000 256.00000
977.00000 336.00000
927.00000 598.00000
774.00000 589.00000
937.00000 703.00000
758.00000 708.00000
930.00000 455.00000
823.00000 420.00000
1016.00000 309.00000
1022.00000 280.00000
1041.00000 299.00000
IMAGE=Ppoecil_popova15c.tif
ID=poecilpop15
LM=13
521.00000 750.00000
732.00000 721.00000
780.00000 169.00000
786.00000 248.00000
688.00000 492.00000
560.00000 483.00000
702.00000 618.00000
538.00000 619.00000
714.00000 357.00000
613.00000 314.00000
855.00000 216.00000
853.00000 193.00000
877.00000 206.00000
IMAGE=Ppoecil_popova16c.tif
ID=poecilpop16
LM=13
640.00000 721.00000
903.00000 666.00000
883.00000 139.00000
894.00000 214.00000
826.00000 480.00000
682.00000 474.00000
850.00000 588.00000
662.00000 597.00000
844.00000 336.00000
722.00000 299.00000
947.00000 188.00000
952.00000 153.00000
972.00000 180.00000
IMAGE=Ppoecil_popova1c.tif
ID=poecilpop1
LM=13
697.00000 757.00000
874.00000 716.00000
888.00000 171.00000
895.00000 246.00000
817.00000 482.00000
687.00000 479.00000
839.00000 617.00000
677.00000 627.00000
827.00000 353.00000
729.00000 321.00000
963.00000 210.00000
962.00000 185.00000
983.00000 201.00000
IMAGE=Ppoecil_popova2c.tif
ID=poecilpop2
LM=13
736.00000 724.00000
916.00000 625.00000
911.00000 88.00000
923.00000 162.00000
857.00000 440.00000
713.00000 444.00000
884.00000 550.00000
721.00000 586.00000
859.00000 287.00000
752.00000 266.00000
983.00000 132.00000
980.00000 105.00000
1009.00000 118.00000
IMAGE=Ppoecil_popova3c.tif
ID=poecilpop3
LM=13
755.00000 759.00000
958.00000 738.00000
966.00000 133.00000
973.00000 211.00000
904.00000 490.00000
759.00000 490.00000
924.00000 620.00000
750.00000 637.00000
916.00000 336.00000
794.00000 308.00000
1042.00000 166.00000
1043.00000 143.00000
1067.00000 149.00000
IMAGE=Ppoecil_popova4c.tif
ID=poecilpop4
LM=13
903.00000 730.00000
1081.00000 631.00000
1052.00000 114.00000
1066.00000 197.00000
1008.00000 428.00000
871.00000 439.00000
1042.00000 541.00000
878.00000 580.00000
1010.00000 293.00000
895.00000 270.00000
1121.00000 165.00000
1126.00000 127.00000
1154.00000 141.00000
IMAGE=Ppoecil_popova5c.tif
ID=poecilpop5
LM=13
678.00000 752.00000
861.00000 710.00000
867.00000 162.00000
876.00000 235.00000
808.00000 481.00000
679.00000 483.00000
826.00000 608.00000
663.00000 634.00000
818.00000 341.00000
717.00000 303.00000
941.00000 203.00000
940.00000 173.00000
969.00000 186.00000
IMAGE=Ppoecil_popova6c.tif
ID=poecilpop6
LM=13
742.00000 663.00000
924.00000 633.00000
942.00000 70.00000
957.00000 154.00000
888.00000 412.00000
748.00000 410.00000
901.00000 536.00000
737.00000 542.00000
900.00000 259.00000
788.00000 215.00000
1023.00000 115.00000
1025.00000 89.00000
1058.00000 97.00000
IMAGE=Ppoecil_popova7c.tif
ID=poecilpop7
LM=13
482.00000 766.00000
667.00000 694.00000
717.00000 186.00000
720.00000 246.00000
627.00000 483.00000
512.00000 480.00000
642.00000 598.00000
494.00000 606.00000
651.00000 351.00000
565.00000 314.00000
766.00000 230.00000
772.00000 198.00000
805.00000 216.00000
IMAGE=Ppoecil_popova8c.tif
ID=poecilpop8
LM=13
479.00000 825.00000
729.00000 809.00000
694.00000 154.00000
701.00000 247.00000
650.00000 537.00000
496.00000 541.00000
671.00000 676.00000
477.00000 682.00000
645.00000 373.00000
525.00000 339.00000
761.00000 202.00000
758.00000 161.00000
798.00000 179.00000
IMAGE=Ppoepse_sharmt2c.jpg
ID=poepsesha2
LM=13
561.00000 880.00000
810.00000 841.00000
768.00000 166.00000
781.00000 250.00000
702.00000 571.00000
570.00000 578.00000
744.00000 717.00000
562.00000 730.00000
701.00000 393.00000
592.00000 370.00000
824.00000 214.00000
827.00000 173.00000
874.00000 190.00000
IMAGE=Ppoepse_sharmt3c.jpg
ID=poepsesha3
LM=13
585.00000 797.00000
815.00000 771.00000
820.00000 160.00000
824.00000 247.00000
744.00000 517.00000
603.00000 503.00000
761.00000 650.00000
590.00000 661.00000
758.00000 368.00000
645.00000 323.00000
890.00000 213.00000
896.00000 181.00000
925.00000 192.00000
IMAGE=Ppoepse_sharmt4c.jpg
ID=poepsesha4
LM=13
534.00000 733.00000
771.00000 692.00000
858.00000 89.00000
858.00000 162.00000
733.00000 420.00000
604.00000 408.00000
736.00000 561.00000
566.00000 557.00000
761.00000 257.00000
670.00000 221.00000
943.00000 139.00000
962.00000 116.00000
978.00000 136.00000
IMAGE=Ppseudo_1kamenagora1c.tif
ID=pseudokam1
LM=13
515.00000 891.00000
771.00000 839.00000
812.00000 94.00000
814.00000 179.00000
679.00000 526.00000
522.00000 525.00000
717.00000 702.00000
510.00000 715.00000
697.00000 310.00000
587.00000 263.00000
898.00000 158.00000
906.00000 118.00000
948.00000 151.00000
IMAGE=Ppseudo_1kamenagora2c.tif
ID=pseudokam2
LM=13
610.00000 877.00000
844.00000 835.00000
884.00000 133.00000
886.00000 218.00000
783.00000 558.00000
630.00000 561.00000
808.00000 713.00000
624.00000 720.00000
787.00000 368.00000
678.00000 321.00000
958.00000 204.00000
979.00000 166.00000
1008.00000 196.00000
IMAGE=Ppseudo_1kamenagora3c.tif
ID=pseudokam3
LM=13
704.00000 943.00000
904.00000 857.00000
905.00000 179.00000
907.00000 256.00000
797.00000 573.00000
678.00000 574.00000
827.00000 726.00000
682.00000 760.00000
809.00000 396.00000
714.00000 377.00000
1014.00000 250.00000
1026.00000 227.00000
1046.00000 249.00000
IMAGE=Ppseudo_1kamenagora5c.tif
ID=pseudokam5
LM=13
689.00000 763.00000
845.00000 728.00000
930.00000 81.00000
931.00000 158.00000
794.00000 463.00000
673.00000 460.00000
809.00000 604.00000
656.00000 607.00000
824.00000 276.00000
746.00000 230.00000
998.00000 141.00000
1013.00000 114.00000
1040.00000 131.00000
IMAGE=Ppseudo_1kamenagora6c.tif
ID=pseudokam6
LM=13
555.00000 854.00000
786.00000 781.00000
804.00000 95.00000
807.00000 175.00000
704.00000 473.00000
569.00000 484.00000
737.00000 637.00000
567.00000 645.00000
719.00000 287.00000
625.00000 245.00000
887.00000 152.00000
898.00000 120.00000
933.00000 140.00000
IMAGE=Ppseudo_1kamenagora7c.tif
ID=pseudokam7
LM=13
478.00000 871.00000
735.00000 772.00000
835.00000 41.00000
837.00000 140.00000
688.00000 466.00000
536.00000 448.00000
698.00000 635.00000
490.00000 646.00000
723.00000 267.00000
611.00000 212.00000
940.00000 137.00000
963.00000 102.00000
983.00000 130.00000
IMAGE=Ppseudo_1kamenagora8c.tif
ID=pseudokam8
LM=13
606.00000 809.00000
840.00000 735.00000
873.00000 54.00000
883.00000 136.00000
765.00000 456.00000
632.00000 447.00000
798.00000 625.00000
605.00000 636.00000
780.00000 276.00000
681.00000 232.00000
976.00000 114.00000
984.00000 88.00000
1000.00000 112.00000
IMAGE=Ppseudo_durmitor10c.tif
ID=pseudodur10
LM=13
558.00000 883.00000
763.00000 830.00000
777.00000 131.00000
783.00000 219.00000
684.00000 543.00000
555.00000 544.00000
722.00000 696.00000
553.00000 720.00000
691.00000 355.00000
591.00000 321.00000
861.00000 189.00000
866.00000 153.00000
898.00000 171.00000
IMAGE=Ppseudo_durmitor1c.tif
ID=pseudodur1
LM=13
576.00000 841.00000
823.00000 756.00000
794.00000 52.00000
800.00000 137.00000
695.00000 477.00000
556.00000 476.00000
731.00000 625.00000
558.00000 650.00000
707.00000 279.00000
596.00000 232.00000
882.00000 118.00000
885.00000 83.00000
914.00000 102.00000
IMAGE=Ppseudo_durmitor3c.tif
ID=pseudodur3
[truncated: 224 more rows]

## Sheet: pronotum
LM=8
511.00000 773.00000
710.00000 735.00000
916.00000 870.00000
975.00000 772.00000
514.00000 529.00000
638.00000 518.00000
860.00000 576.00000
542.00000 690.00000
IMAGE=Paffaff_bratiya1pl.tif
ID=affaffbra1
LM=8
460.00000 762.00000
644.00000 700.00000
806.00000 832.00000
871.00000 678.00000
415.00000 526.00000
535.00000 484.00000
751.00000 513.00000
461.00000 667.00000
IMAGE=Paffaff_bratiya2pl.tif
ID=affaffbra2
LM=8
418.00000 691.00000
602.00000 634.00000
805.00000 788.00000
864.00000 696.00000
382.00000 466.00000
512.00000 431.00000
766.00000 493.00000
597.00000 599.00000
IMAGE=Paffaff_bratiya3pl.tif
ID=affaffbra3
LM=8
498.00000 675.00000
660.00000 643.00000
887.00000 730.00000
910.00000 655.00000
486.00000 465.00000
602.00000 447.00000
801.00000 497.00000
659.00000 595.00000
IMAGE=Paffaff_bratiya4pl.tif
ID=affaffbra4
LM=8
494.00000 684.00000
662.00000 636.00000
855.00000 793.00000
925.00000 632.00000
483.00000 440.00000
588.00000 422.00000
808.00000 465.00000
518.00000 591.00000
IMAGE=Paffaff_bratiya5pl.tif
ID=affaffbra5
LM=8
498.00000 822.00000
710.00000 768.00000
918.00000 914.00000
974.00000 743.00000
488.00000 572.00000
594.00000 536.00000
814.00000 570.00000
660.00000 704.00000
IMAGE=Paffaff_bratiya6pl.tif
ID=affaffbra6
LM=8
687.00000 794.00000
864.00000 730.00000
1084.00000 844.00000
1108.00000 699.00000
612.00000 563.00000
743.00000 509.00000
952.00000 530.00000
826.00000 650.00000
IMAGE=Paffaff_bratiya7pl.tif
ID=affaffbra7
LM=8
502.00000 765.00000
691.00000 729.00000
898.00000 871.00000
959.00000 723.00000
474.00000 503.00000
607.00000 490.00000
808.00000 543.00000
731.00000 676.00000
IMAGE=Paffaff_kirilova1pl.tif
ID=affaffkir1
LM=8
625.00000 738.00000
796.00000 677.00000
1001.00000 827.00000
1055.00000 743.00000
586.00000 516.00000
687.00000 501.00000
932.00000 572.00000
756.00000 651.00000
IMAGE=Paffaff_kirilova2pl.tif
ID=affaffkir2
LM=8
583.00000 714.00000
742.00000 667.00000
944.00000 814.00000
988.00000 654.00000
553.00000 508.00000
671.00000 489.00000
891.00000 525.00000
732.00000 642.00000
IMAGE=Paffaff_osogovo2pl.tif
ID=affaffoso2
LM=8
457.00000 792.00000
643.00000 757.00000
851.00000 864.00000
893.00000 737.00000
425.00000 531.00000
568.00000 519.00000
766.00000 583.00000
598.00000 693.00000
IMAGE=Paffaff_osogovo3pl.tif
ID=affaffoso3
LM=8
668.00000 791.00000
849.00000 751.00000
1026.00000 865.00000
1062.00000 762.00000
657.00000 571.00000
769.00000 549.00000
955.00000 600.00000
811.00000 708.00000
IMAGE=Paffaff_osogovo4pl.tif
ID=affaffoso4
LM=8
559.00000 657.00000
727.00000 616.00000
938.00000 741.00000
981.00000 656.00000
542.00000 449.00000
643.00000 431.00000
863.00000 481.00000
624.00000 600.00000
IMAGE=Paffaff_osogovo5pl.tif
ID=affaffoso5
LM=8
440.00000 762.00000
617.00000 726.00000
845.00000 836.00000
883.00000 785.00000
437.00000 562.00000
573.00000 545.00000
770.00000 609.00000
617.00000 689.00000
IMAGE=Paffaff_osogovo6pl.tif
ID=affaffoso6
LM=8
491.00000 710.00000
681.00000 684.00000
885.00000 809.00000
935.00000 710.00000
488.00000 481.00000
621.00000 470.00000
826.00000 530.00000
626.00000 618.00000
IMAGE=Paffaff_osogovo7pl.tif
ID=affaffoso7
LM=8
408.00000 747.00000
593.00000 688.00000
882.00000 823.00000
899.00000 670.00000
350.00000 495.00000
484.00000 472.00000
748.00000 515.00000
433.00000 655.00000
IMAGE=Paffaff_pirin1pl.tif
ID=affaffpir1
LM=8
478.00000 609.00000
650.00000 584.00000
841.00000 737.00000
955.00000 641.00000
510.00000 384.00000
640.00000 387.00000
852.00000 474.00000
638.00000 548.00000
IMAGE=Paffaff_pirin2pl.JPG
ID=affaffpir2
LM=8
429.00000 817.00000
633.00000 752.00000
885.00000 858.00000
929.00000 772.00000
415.00000 586.00000
550.00000 561.00000
795.00000 594.00000
476.00000 738.00000
IMAGE=Paffaff_pirin3pl.tif
ID=affaffpir3
LM=8
488.00000 800.00000
667.00000 701.00000
910.00000 860.00000
951.00000 702.00000
407.00000 555.00000
525.00000 514.00000
790.00000 524.00000
523.00000 696.00000
IMAGE=Paffaff_pirin4pl.tif
ID=affaffpir4
LM=8
529.00000 670.00000
675.00000 648.00000
888.00000 770.00000
960.00000 692.00000
555.00000 479.00000
638.00000 477.00000
850.00000 542.00000
681.00000 614.00000
IMAGE=Paffaff_rila11pl.JPG
ID=affaffril11
LM=8
542.00000 717.00000
755.00000 674.00000
962.00000 809.00000
1004.00000 690.00000
535.00000 469.00000
661.00000 456.00000
885.00000 522.00000
732.00000 628.00000
IMAGE=Paffaff_rila12pl.tif
ID=affaffril12
LM=8
596.00000 715.00000
796.00000 677.00000
1027.00000 820.00000
1057.00000 724.00000
573.00000 488.00000
648.00000 490.00000
911.00000 532.00000
740.00000 649.00000
IMAGE=Paffaff_rila5pl.tif
ID=affaffril5
LM=8
529.00000 682.00000
712.00000 634.00000
966.00000 733.00000
987.00000 695.00000
546.00000 477.00000
684.00000 484.00000
876.00000 531.00000
716.00000 615.00000
IMAGE=Paffaff_rila6pl.tif
ID=affaffril6
LM=8
590.00000 800.00000
768.00000 765.00000
1012.00000 852.00000
1047.00000 790.00000
594.00000 555.00000
713.00000 543.00000
927.00000 611.00000
778.00000 720.00000
IMAGE=Paffaff_rila7pl.tif
ID=affaffril7
LM=8
411.00000 711.00000
607.00000 682.00000
840.00000 814.00000
884.00000 718.00000
407.00000 465.00000
522.00000 450.00000
750.00000 522.00000
596.00000 630.00000
IMAGE=Paffaff_rila8pl.tif
ID=affaffril8
LM=8
502.00000 704.00000
710.00000 663.00000
947.00000 762.00000
1001.00000 666.00000
509.00000 441.00000
646.00000 426.00000
884.00000 493.00000
661.00000 596.00000
IMAGE=Paffaff_rila9pl.tif
ID=affaffril9
LM=8
359.00000 706.00000
569.00000 653.00000
857.00000 807.00000
877.00000 691.00000
302.00000 461.00000
439.00000 425.00000
711.00000 516.00000
504.00000 613.00000
IMAGE=Paffdin_susica1pl.tif
ID=affdinsus1
LM=8
510.00000 593.00000
674.00000 569.00000
878.00000 717.00000
920.00000 668.00000
517.00000 389.00000
650.00000 388.00000
806.00000 489.00000
662.00000 549.00000
IMAGE=Paffhaj_hajla1pl.JPG
ID=affhajhaj1
LM=8
518.00000 729.00000
704.00000 725.00000
861.00000 870.00000
934.00000 764.00000
515.00000 524.00000
625.00000 511.00000
845.00000 593.00000
687.00000 674.00000
IMAGE=Paffhaj_hajla3pl.tif
ID=affhajhaj3
LM=8
475.00000 686.00000
665.00000 644.00000
860.00000 747.00000
907.00000 685.00000
473.00000 486.00000
573.00000 474.00000
796.00000 542.00000
608.00000 615.00000
IMAGE=Paffhaj_hajla4pl.JPG
ID=affhajhaj4
LM=8
539.00000 592.00000
753.00000 594.00000
915.00000 731.00000
957.00000 633.00000
551.00000 369.00000
675.00000 369.00000
884.00000 466.00000
693.00000 533.00000
IMAGE=Paffhaj_hajla5pl.tif
ID=affhajhaj5
LM=8
460.00000 722.00000
630.00000 715.00000
853.00000 842.00000
890.00000 751.00000
486.00000 507.00000
600.00000 509.00000
790.00000 582.00000
598.00000 671.00000
IMAGE=Paffhaj_hajla6pl.tif
ID=affhajhaj6
LM=8
425.00000 633.00000
708.00000 623.00000
997.00000 835.00000
1075.00000 715.00000
420.00000 348.00000
599.00000 330.00000
901.00000 440.00000
724.00000 586.00000
IMAGE=Paffkom_Luc1pl.tif
ID=affkomluc1
LM=8
358.00000 636.00000
680.00000 587.00000
971.00000 776.00000
1058.00000 534.00000
346.00000 274.00000
543.00000 231.00000
893.00000 312.00000
682.00000 509.00000
IMAGE=Paffkom_luc3pl.tif
ID=affkomluc3
LM=8
362.00000 836.00000
659.00000 792.00000
942.00000 944.00000
1009.00000 797.00000
340.00000 482.00000
524.00000 451.00000
833.00000 529.00000
644.00000 704.00000
IMAGE=Paffkom_Luc4pl.tif
ID=affkomluc4
LM=8
351.00000 821.00000
562.00000 763.00000
842.00000 942.00000
880.00000 728.00000
293.00000 481.00000
443.00000 430.00000
736.00000 503.00000
456.00000 695.00000
IMAGE=Paffrum_kolasin10pl.tif
ID=affrumkol10
LM=8
490.00000 643.00000
722.00000 593.00000
962.00000 748.00000
1030.00000 632.00000
506.00000 366.00000
645.00000 347.00000
906.00000 430.00000
713.00000 543.00000
IMAGE=Paffrum_kolasin11pl.JPG
ID=affrumkol11
LM=8
542.00000 642.00000
746.00000 587.00000
1030.00000 768.00000
1092.00000 610.00000
530.00000 385.00000
683.00000 342.00000
982.00000 412.00000
757.00000 526.00000
IMAGE=Paffrum_kolasin12pl.JPG
ID=affrumkol12
LM=8
512.00000 793.00000
734.00000 725.00000
1044.00000 862.00000
1037.00000 735.00000
437.00000 481.00000
587.00000 420.00000
864.00000 458.00000
687.00000 625.00000
IMAGE=Paffrum_kolasin1pl.tif
ID=affrumkol1
LM=8
496.00000 784.00000
703.00000 733.00000
992.00000 888.00000
1018.00000 613.00000
439.00000 445.00000
596.00000 391.00000
870.00000 416.00000
651.00000 598.00000
IMAGE=Paffrum_kolasin2pl.tif
ID=affrumkol2
LM=8
419.00000 766.00000
635.00000 715.00000
901.00000 895.00000
957.00000 688.00000
360.00000 443.00000
515.00000 397.00000
802.00000 460.00000
608.00000 607.00000
IMAGE=Paffrum_kolasin3pl.tif
ID=affrumkol3
LM=8
510.00000 820.00000
726.00000 756.00000
1015.00000 892.00000
1050.00000 668.00000
447.00000 491.00000
599.00000 421.00000
877.00000 462.00000
682.00000 629.00000
IMAGE=Paffrum_kolasin4pl.tif
ID=affrumkol4
LM=8
475.00000 745.00000
686.00000 676.00000
935.00000 868.00000
963.00000 741.00000
414.00000 465.00000
571.00000 437.00000
839.00000 537.00000
607.00000 617.00000
IMAGE=Paffrum_kolasin5pl.tif
ID=affrumkol5
LM=8
493.00000 870.00000
716.00000 821.00000
972.00000 948.00000
967.00000 828.00000
416.00000 563.00000
571.00000 520.00000
833.00000 604.00000
655.00000 715.00000
IMAGE=Paffrum_kolasin6pl.tif
ID=affrumkol6
LM=8
433.00000 666.00000
658.00000 606.00000
924.00000 769.00000
909.00000 618.00000
368.00000 343.00000
510.00000 313.00000
810.00000 391.00000
565.00000 540.00000
IMAGE=Paffrum_kolasin7pl.tif
ID=affrumkol7
LM=8
338.00000 829.00000
582.00000 777.00000
839.00000 951.00000
851.00000 811.00000
285.00000 527.00000
410.00000 489.00000
706.00000 561.00000
528.00000 696.00000
IMAGE=Paffrum_kolasin8pl.tif
ID=affrumkol8
LM=8
300.00000 793.00000
539.00000 758.00000
811.00000 917.00000
864.00000 702.00000
273.00000 498.00000
435.00000 459.00000
702.00000 525.00000
478.00000 690.00000
IMAGE=Paffrum_kolasin9pl.tif
ID=affrumkol9
LM=8
548.00000 652.00000
704.00000 625.00000
893.00000 750.00000
944.00000 652.00000
567.00000 464.00000
670.00000 473.00000
852.00000 522.00000
564.00000 590.00000
IMAGE=Paffser_ljuboten14pl.JPG
ID=affserlju14
LM=8
560.00000 643.00000
704.00000 586.00000
890.00000 715.00000
941.00000 605.00000
528.00000 442.00000
660.00000 425.00000
862.00000 479.00000
555.00000 593.00000
IMAGE=Paffser_ljuboten15pl.JPG
ID=affserlju15
LM=8
534.00000 715.00000
710.00000 667.00000
923.00000 761.00000
964.00000 700.00000
529.00000 528.00000
655.00000 509.00000
866.00000 565.00000
711.00000 631.00000
IMAGE=Paffser_ljuboten2pl.JPG
ID=affserlju2
LM=8
553.00000 627.00000
720.00000 579.00000
931.00000 701.00000
982.00000 620.00000
543.00000 424.00000
650.00000 410.00000
846.00000 476.00000
593.00000 554.00000
IMAGE=Paffser_ljuboten3pl.JPG
ID=affserlju3
LM=8
571.00000 715.00000
722.00000 682.00000
910.00000 792.00000
952.00000 715.00000
577.00000 530.00000
681.00000 524.00000
869.00000 572.00000
616.00000 643.00000
IMAGE=Paffser_ljuboten4pl.JPG
ID=affserlju4
LM=8
513.00000 651.00000
661.00000 617.00000
917.00000 736.00000
958.00000 681.00000
513.00000 482.00000
615.00000 471.00000
840.00000 518.00000
697.00000 603.00000
IMAGE=Paffser_ljuboten5pl.JPG
ID=affserlju5
LM=8
540.00000 706.00000
696.00000 682.00000
913.00000 830.00000
967.00000 734.00000
527.00000 497.00000
634.00000 482.00000
853.00000 557.00000
567.00000 648.00000
IMAGE=Paffser_ljuboten6pl.JPG
ID=affserlju6
LM=8
526.00000 664.00000
697.00000 622.00000
941.00000 773.00000
975.00000 671.00000
514.00000 467.00000
643.00000 444.00000
855.00000 500.00000
556.00000 594.00000
IMAGE=Paffser_ljuboten7pl.JPG
ID=affserlju7
LM=8
523.00000 676.00000
690.00000 642.00000
891.00000 762.00000
915.00000 721.00000
534.00000 484.00000
650.00000 476.00000
828.00000 574.00000
554.00000 617.00000
IMAGE=Paffser_ljuboten8pl.JPG
ID=affserlju8
LM=8
477.00000 571.00000
641.00000 556.00000
755.00000 662.00000
824.00000 581.00000
483.00000 392.00000
605.00000 405.00000
752.00000 457.00000
636.00000 519.00000
IMAGE=Pgracil_mratinje2pl.tif
ID=gracilmra2
LM=8
465.00000 700.00000
650.00000 661.00000
879.00000 789.00000
947.00000 631.00000
420.00000 454.00000
548.00000 428.00000
785.00000 466.00000
600.00000 601.00000
IMAGE=Phoelze_nidzhe3pl.jpg
ID=hoelzenid3
LM=8
480.00000 702.00000
668.00000 687.00000
962.00000 779.00000
973.00000 689.00000
456.00000 466.00000
574.00000 439.00000
803.00000 518.00000
489.00000 624.00000
IMAGE=Phoelze_nidzhe4pl.jpg
ID=hoelzenid4
LM=8
594.00000 707.00000
788.00000 663.00000
1089.00000 802.00000
1116.00000 685.00000
543.00000 423.00000
685.00000 385.00000
975.00000 462.00000
741.00000 602.00000
IMAGE=Phoelze_nidzhe5pl.jpg
ID=hoelzenid5
LM=8
438.00000 700.00000
650.00000 636.00000
889.00000 823.00000
943.00000 670.00000
402.00000 406.00000
557.00000 373.00000
817.00000 460.00000
417.00000 615.00000
IMAGE=Phoelze_nidzhe7pl.jpg
ID=hoelzenid7
LM=8
547.00000 663.00000
777.00000 629.00000
1065.00000 804.00000
1102.00000 619.00000
523.00000 351.00000
668.00000 330.00000
965.00000 416.00000
546.00000 557.00000
IMAGE=Phoelze_nidzhe8pl.jpg
ID=hoelzenid8
LM=8
439.00000 674.00000
633.00000 644.00000
896.00000 795.00000
933.00000 704.00000
426.00000 416.00000
561.00000 403.00000
812.00000 497.00000
444.00000 591.00000
IMAGE=Phoelze_nidzhe9pl.jpg
ID=hoelzenid9
LM=8
687.00000 574.00000
810.00000 546.00000
954.00000 641.00000
970.00000 585.00000
698.00000 421.00000
757.00000 418.00000
901.00000 467.00000
813.00000 524.00000
IMAGE=Pjablan_jablanica1pl.jpg
ID=jablanjab1
LM=8
573.00000 618.00000
708.00000 596.00000
876.00000 677.00000
883.00000 607.00000
553.00000 443.00000
631.00000 434.00000
803.00000 497.00000
702.00000 547.00000
IMAGE=Pjablan_jablanica4pl.jpg
ID=jablanjab4
LM=8
522.00000 637.00000
641.00000 605.00000
763.00000 685.00000
765.00000 635.00000
489.00000 493.00000
556.00000 480.00000
692.00000 518.00000
617.00000 580.00000
IMAGE=Pjablan_jablanica5pl.jpg
ID=jablanjab5
LM=8
552.00000 685.00000
764.00000 658.00000
993.00000 747.00000
1016.00000 633.00000
526.00000 391.00000
688.00000 368.00000
916.00000 465.00000
727.00000 579.00000
IMAGE=Pnobili_lalas2pl.jpg
ID=nobililal2
LM=8
398.00000 666.00000
608.00000 667.00000
821.00000 769.00000
857.00000 685.00000
424.00000 402.00000
538.00000 392.00000
762.00000 484.00000
593.00000 598.00000
IMAGE=Pnobili_nemea1pl.jpg
ID=nobilinem1
LM=8
482.00000 654.00000
674.00000 613.00000
846.00000 732.00000
938.00000 601.00000
479.00000 453.00000
599.00000 427.00000
827.00000 480.00000
654.00000 564.00000
IMAGE=Pnonvei_susica11pl.JPG
ID=nonveisus11
LM=8
566.00000 716.00000
724.00000 666.00000
904.00000 791.00000
929.00000 695.00000
536.00000 503.00000
668.00000 491.00000
882.00000 546.00000
576.00000 644.00000
IMAGE=Pnonvei_susica12pl.JPG
ID=nonveisus12
LM=8
498.00000 778.00000
650.00000 739.00000
832.00000 838.00000
893.00000 752.00000
490.00000 579.00000
604.00000 575.00000
804.00000 629.00000
653.00000 701.00000
IMAGE=Pnonvei_susica1pl.JPG
ID=nonveisus1
LM=8
489.00000 658.00000
681.00000 627.00000
884.00000 757.00000
956.00000 653.00000
487.00000 453.00000
621.00000 441.00000
846.00000 488.00000
642.00000 597.00000
IMAGE=Pnonvei_susica2pl.JPG
ID=nonveisus2
LM=8
503.00000 716.00000
670.00000 674.00000
844.00000 789.00000
921.00000 715.00000
511.00000 532.00000
629.00000 530.00000
826.00000 588.00000
670.00000 653.00000
IMAGE=Pnonvei_susica3pl.JPG
ID=nonveisus3
LM=8
530.00000 718.00000
704.00000 682.00000
914.00000 809.00000
983.00000 726.00000
532.00000 527.00000
669.00000 519.00000
874.00000 580.00000
674.00000 658.00000
IMAGE=Pnonvei_susica4pl.JPG
ID=nonveisus4
LM=8
534.00000 638.00000
697.00000 605.00000
906.00000 729.00000
978.00000 636.00000
489.00000 425.00000
609.00000 420.00000
834.00000 478.00000
699.00000 570.00000
IMAGE=Pnonvei_susica5pl.JPG
ID=nonveisus5
LM=8
510.00000 734.00000
652.00000 694.00000
841.00000 794.00000
895.00000 721.00000
489.00000 575.00000
604.00000 569.00000
791.00000 604.00000
637.00000 678.00000
IMAGE=Pnonvei_susica6pl.JPG
ID=nonveisus6
LM=8
348.00000 735.00000
647.00000 733.00000
1014.00000 796.00000
1002.00000 705.00000
351.00000 438.00000
536.00000 431.00000
829.00000 517.00000
733.00000 664.00000
IMAGE=Pobesus_loanina10pl.jpg
ID=obesusloa10
LM=8
438.00000 739.00000
700.00000 727.00000
1029.00000 786.00000
1028.00000 702.00000
425.00000 451.00000
553.00000 431.00000
878.00000 508.00000
716.00000 656.00000
IMAGE=Pobesus_loanina11pl.jpg
ID=obesusloa11
LM=8
470.00000 789.00000
706.00000 788.00000
971.00000 846.00000
999.00000 770.00000
473.00000 474.00000
576.00000 465.00000
862.00000 567.00000
812.00000 699.00000
IMAGE=Pobesus_loanina12pl.jpg
ID=obesusloa12
LM=8
452.00000 621.00000
719.00000 608.00000
1090.00000 634.00000
1102.00000 582.00000
488.00000 338.00000
624.00000 328.00000
927.00000 396.00000
850.00000 549.00000
IMAGE=Pobesus_loanina13pl.jpg
ID=obesusloa13
LM=8
268.00000 583.00000
550.00000 593.00000
919.00000 635.00000
932.00000 558.00000
315.00000 252.00000
500.00000 240.00000
789.00000 373.00000
735.00000 512.00000
IMAGE=Pobesus_loanina15pl.jpg
ID=obesusloa15
LM=8
412.00000 586.00000
685.00000 596.00000
1009.00000 633.00000
1010.00000 580.00000
431.00000 283.00000
567.00000 278.00000
865.00000 382.00000
821.00000 510.00000
IMAGE=Pobesus_loanina3pl.jpg
ID=obesusloa3
LM=8
396.00000 630.00000
672.00000 634.00000
1035.00000 697.00000
1037.00000 649.00000
419.00000 306.00000
574.00000 289.00000
888.00000 405.00000
783.00000 534.00000
IMAGE=Pobesus_loanina4pl.jpg
ID=obesusloa4
LM=8
350.00000 639.00000
626.00000 643.00000
941.00000 674.00000
968.00000 565.00000
375.00000 318.00000
509.00000 303.00000
818.00000 392.00000
760.00000 523.00000
IMAGE=Pobesus_loanina5pl.jpg
ID=obesusloa5
LM=8
296.00000 633.00000
547.00000 641.00000
872.00000 705.00000
884.00000 669.00000
313.00000 326.00000
460.00000 320.00000
747.00000 430.00000
619.00000 558.00000
IMAGE=Pobesus_loanina6pl.jpg
ID=obesusloa6
LM=8
443.00000 638.00000
706.00000 644.00000
1012.00000 692.00000
1016.00000 646.00000
431.00000 319.00000
587.00000 295.00000
876.00000 404.00000
785.00000 544.00000
IMAGE=Pobesus_loanina7pl.jpg
ID=obesusloa7
LM=8
428.00000 608.00000
694.00000 596.00000
1012.00000 666.00000
1018.00000 538.00000
430.00000 275.00000
590.00000 254.00000
878.00000 334.00000
739.00000 490.00000
IMAGE=Pobesus_loanina8pl.jpg
ID=obesusloa8
LM=8
536.00000 820.00000
722.00000 777.00000
929.00000 910.00000
964.00000 760.00000
516.00000 581.00000
650.00000 551.00000
886.00000 625.00000
707.00000 700.00000
IMAGE=Ppoecil_popova2pl.tif
ID=poecilpop2
LM=8
375.00000 521.00000
560.00000 480.00000
765.00000 611.00000
817.00000 501.00000
345.00000 285.00000
490.00000 253.00000
723.00000 321.00000
519.00000 432.00000
IMAGE=Ppoecil_popova3pl.tif
ID=poecilpop3
LM=8
397.00000 747.00000
564.00000 676.00000
797.00000 775.00000
821.00000 697.00000
345.00000 538.00000
455.00000 496.00000
721.00000 547.00000
536.00000 639.00000
IMAGE=Ppoecil_popova5pl.tif
ID=poecilpop5
LM=8
300.00000 905.00000
478.00000 869.00000
700.00000 987.00000
734.00000 923.00000
301.00000 699.00000
424.00000 678.00000
644.00000 769.00000
332.00000 837.00000
IMAGE=Ppoecil_popova6pl.tif
ID=poecilpop6
LM=8
573.00000 734.00000
783.00000 680.00000
1029.00000 828.00000
1022.00000 628.00000
529.00000 450.00000
653.00000 427.00000
940.00000 492.00000
591.00000 620.00000
IMAGE=Ppoepse_sharmt2pl.jpg
ID=poepsesha2
LM=8
414.00000 646.00000
618.00000 617.00000
828.00000 798.00000
871.00000 621.00000
376.00000 379.00000
521.00000 364.00000
762.00000 432.00000
441.00000 557.00000
IMAGE=Ppoepse_sharmt3pl.jpg
ID=poepsesha3
LM=8
457.00000 751.00000
636.00000 686.00000
899.00000 821.00000
925.00000 749.00000
434.00000 507.00000
572.00000 485.00000
805.00000 561.00000
602.00000 645.00000
IMAGE=Ppoepse_sharmt4pl.jpg
ID=poepsesha4
LM=8
455.00000 822.00000
678.00000 790.00000
916.00000 906.00000
931.00000 807.00000
436.00000 587.00000
552.00000 563.00000
802.00000 636.00000
479.00000 754.00000
IMAGE=Ppseudo_1kamenagora2pl.tif
ID=pseudokam2
LM=8
450.00000 805.00000
718.00000 796.00000
967.00000 902.00000
968.00000 835.00000
441.00000 528.00000
588.00000 515.00000
850.00000 616.00000
463.00000 719.00000
IMAGE=Ppseudo_1kamenagora3pl.tif
ID=pseudokam3
LM=8
496.00000 838.00000
720.00000 799.00000
975.00000 930.00000
1006.00000 816.00000
484.00000 578.00000
620.00000 556.00000
876.00000 621.00000
500.00000 754.00000
IMAGE=Ppseudo_1kamenagora5pl.tif
ID=pseudokam5
LM=8
534.00000 695.00000
759.00000 670.00000
1024.00000 779.00000
1026.00000 712.00000
522.00000 465.00000
671.00000 462.00000
925.00000 540.00000
564.00000 626.00000
IMAGE=Ppseudo_1kamenagora6pl.tif
ID=pseudokam6
LM=8
541.00000 786.00000
784.00000 750.00000
1029.00000 856.00000
1054.00000 780.00000
551.00000 491.00000
686.00000 483.00000
947.00000 575.00000
588.00000 684.00000
IMAGE=Ppseudo_1kamenagora7pl.tif
ID=pseudokam7
LM=8
514.00000 799.00000
741.00000 751.00000
1007.00000 842.00000
993.00000 762.00000
469.00000 530.00000
613.00000 504.00000
866.00000 587.00000
518.00000 713.00000
IMAGE=Ppseudo_1kamenagora8pl.tif
ID=pseudokam8
LM=8
467.00000 750.00000
700.00000 738.00000
953.00000 874.00000
978.00000 778.00000
498.00000 500.00000
620.00000 491.00000
868.00000 573.00000
712.00000 695.00000
IMAGE=Ppseudo_durmitor10pl.tif
ID=pseudodur10
LM=8
457.00000 780.00000
688.00000 755.00000
971.00000 835.00000
957.00000 775.00000
435.00000 565.00000
584.00000 539.00000
833.00000 620.00000
752.00000 727.00000
IMAGE=Ppseudo_durmitor1pl.tif
ID=pseudodur1
LM=8
487.00000 742.00000
703.00000 697.00000
1004.00000 805.00000
1036.00000 733.00000
494.00000 499.00000
637.00000 484.00000
896.00000 552.00000
755.00000 673.00000
IMAGE=Ppseudo_durmitor2pl.JPG
ID=pseudodur2
LM=8
549.00000 704.00000
793.00000 722.00000
1052.00000 834.00000
1051.00000 751.00000
576.00000 469.00000
701.00000 447.00000
945.00000 572.00000
851.00000 682.00000
IMAGE=Ppseudo_durmitor3pl.tif
ID=pseudodur3
LM=8
449.00000 757.00000
690.00000 735.00000
956.00000 846.00000
943.00000 756.00000
415.00000 476.00000
575.00000 451.00000
838.00000 572.00000
674.00000 664.00000
IMAGE=Ppseudo_durmitor4pl.tif
ID=pseudodur4
LM=8
524.00000 728.00000
749.00000 688.00000
1009.00000 814.00000
1038.00000 698.00000
504.00000 472.00000
649.00000 441.00000
911.00000 520.00000
747.00000 644.00000
IMAGE=Ppseudo_durmitor7pl.tif
ID=pseudodur7
LM=8
429.00000 710.00000
646.00000 662.00000
902.00000 755.00000
903.00000 688.00000
401.00000 453.00000
552.00000 425.00000
800.00000 512.00000
434.00000 626.00000
IMAGE=Ppseudo_tresnjevik1pl.tif
ID=pseudotre1
LM=8
397.00000 760.00000
668.00000 718.00000
903.00000 814.00000
924.00000 746.00000
395.00000 472.00000
542.00000 462.00000
817.00000 533.00000
420.00000 669.00000
IMAGE=Ppseudo_tresnjevik2pl.tif
ID=pseudotre2
LM=8
476.00000 729.00000
720.00000 701.00000
953.00000 824.00000
978.00000 731.00000
494.00000 471.00000
628.00000 465.00000
865.00000 541.00000
714.00000 657.00000
IMAGE=Ppseudo_tresnjevik3pl.tif
ID=pseudotre3
LM=8
531.00000 700.00000
757.00000 666.00000
1035.00000 781.00000
1064.00000 690.00000
557.00000 411.00000
712.00000 404.00000
953.00000 481.00000
570.00000 603.00000
IMAGE=Ppseudo_tresnjevik4pl.tif
ID=pseudotre4
LM=8
589.00000 716.00000
842.00000 679.00000
1058.00000 749.00000
1079.00000 661.00000
577.00000 438.00000
703.00000 415.00000
971.00000 472.00000
579.00000 619.00000
IMAGE=Ppseudo_vusanje1pl.tif
ID=pseudovus1
LM=8
447.00000 678.00000
663.00000 643.00000
948.00000 762.00000
961.00000 705.00000
445.00000 439.00000
608.00000 439.00000
852.00000 515.00000
449.00000 611.00000
IMAGE=Ppseudo_vusanje2pl.JPG
ID=pseudovus2
LM=8
636.00000 749.00000
846.00000 713.00000
1094.00000 811.00000
1100.00000 730.00000
625.00000 485.00000
777.00000 468.00000
1010.00000 550.00000
622.00000 670.00000
IMAGE=Ppseudo_vusanje3pl.tif
ID=pseudovus3
LM=8
524.00000 766.00000
762.00000 751.00000
1020.00000 863.00000
1034.00000 765.00000
549.00000 484.00000
706.00000 480.00000
936.00000 564.00000
529.00000 674.00000
IMAGE=Ppseudo_vusanje5pl.tif
ID=pseudovus5
LM=8
505.00000 749.00000
700.00000 714.00000
923.00000 813.00000
954.00000 736.00000
510.00000 507.00000
651.00000 503.00000
836.00000 558.00000
510.00000 681.00000
IMAGE=Ppseudo_vusanje6pl.JPG
ID=pseudovus6
LM=8
464.00000 835.00000
701.00000 811.00000
965.00000 898.00000
973.00000 825.00000
470.00000 566.00000
618.00000 545.00000
869.00000 637.00000
483.00000 757.00000
IMAGE=Ppseudo_vusanje7pl.tif
ID=pseudovus7
LM=8
455.00000 711.00000
659.00000 685.00000
925.00000 812.00000
968.00000 650.00000
435.00000 444.00000
605.00000 420.00000
862.00000 503.00000
434.00000 623.00000
IMAGE=Ppseudo_vusanje8pl.tif
ID=pseudovus8

## Sheet: stridulatory's file
Taxon full name	Collection Date	Year	Country	Exact Site/Locality	Latitude decimal degrees	Longitude decimal degrees	Altitude (m)	Collectors	Notes	Stridulatory file-length (mm)	Stridulatory teeth counted (N)
Poecilimon (Poecilimon) affinis (Frivaldszky, 1868)	30.VI.2017	2017	Bulgaria	Sashtinska Sredna Gora Mt., Bratiya				D.Chobanov		4,06	126
Poecilimon (Poecilimon) affinis (Frivaldszky, 1868)	30.VI.2017	2017	Bulgaria	Sashtinska Sredna Gora Mt., Bratiya				D.Chobanov	left wing is torn and missing
Poecilimon (Poecilimon) affinis (Frivaldszky, 1868)	30.VI.2017	2017	Bulgaria	Sashtinska Sredna Gora Mt., Bratiya				D.Chobanov		4,08	169
Poecilimon (Poecilimon) affinis (Frivaldszky, 1868)	30.VI.2017	2017	Bulgaria	Sashtinska Sredna Gora Mt., Bratiya				D.Chobanov		3,68	164
Poecilimon (Poecilimon) affinis (Frivaldszky, 1868)	30.VI.2017	2017	Bulgaria	Sashtinska Sredna Gora Mt., Bratiya				D.Chobanov		3,80	160
Poecilimon (Poecilimon) affinis (Frivaldszky, 1868)	30.VI.2017	2017	Bulgaria	Sashtinska Sredna Gora Mt., Bratiya				D.Chobanov		3,95	135
Poecilimon (Poecilimon) affinis (Frivaldszky, 1868)	30.VI.2017	2017	Bulgaria	Sashtinska Sredna Gora Mt., Bratiya				D.Chobanov		4,18	141
Poecilimon (Poecilimon) affinis (Frivaldszky, 1868)	10.IX.2012	2012	Bulgaria	Stara Planina Mts., Tri Chuki peak			1850	D.Chobanov		4,46	122
Poecilimon (Poecilimon) affinis (Frivaldszky, 1868)	10.IX.2012	2012	Bulgaria	Stara Planina Mts., Tri Chuki peak			1850	D.Chobanov		4,42	155
Poecilimon (Poecilimon) affinis affinis (Frivaldszky, 1868)	02.VII.2017	2017	Bulgaria	Pirin Mt., Yavorov hut	41.823650	23.378000	1760	D.Chobanov		4,08	148
Poecilimon (Poecilimon) affinis affinis (Frivaldszky, 1868)	02.VII.2017	2017	Bulgaria	Rila Mt., Kirilova polyana place				D.Chobanov		4,32	139
Poecilimon (Poecilimon) affinis affinis (Frivaldszky, 1868)	02.VII.2017	2017	Bulgaria	Rila Mt., Kirilova polyana place				D.Chobanov		4,27	130
Poecilimon (Poecilimon) affinis affinis (Frivaldszky, 1868)	02.VII.2017	2017	Bulgaria	Pirin Mt., Yavorov hut	41.823650	23.378000	1760	D.Chobanov		4,37	151
Poecilimon (Poecilimon) affinis affinis (Frivaldszky, 1868)	02.VII.2017	2017	Bulgaria	Pirin Mt., Yavorov hut	41.823650	23.378000	1760	D.Chobanov		4,32	143
Poecilimon (Poecilimon) affinis affinis (Frivaldszky, 1868)	02.VII.2017	2017	Bulgaria	Pirin Mt., Yavorov hut	41.823650	23.378000	1760	D.Chobanov		4,32	145
Poecilimon (Poecilimon) affinis affinis (Frivaldszky, 1868)	02.VII.2017	2017	Bulgaria	Pirin Mt., Yavorov hut	41.823650	23.378000	1760	D.Chobanov		4,08	142
Poecilimon (Poecilimon) affinis affinis (Frivaldszky, 1868)	01.VII.2017	2017	Bulgaria	Osogovo Mt., Beg Bunar place	42.188400	22.580480	1800	D.Chobanov		3,84	146
Poecilimon (Poecilimon) affinis affinis (Frivaldszky, 1868)	01.VII.2017	2017	Bulgaria	Osogovo Mt., Beg Bunar place	42.188400	22.580480	1800	D.Chobanov		4,08	139
Poecilimon (Poecilimon) affinis affinis (Frivaldszky, 1868)	01.VII.2017	2017	Bulgaria	Osogovo Mt., Beg Bunar place	42.188400	22.580480	1800	D.Chobanov		4,03	141
Poecilimon (Poecilimon) affinis affinis (Frivaldszky, 1868)	01.VII.2017	2017	Bulgaria	Osogovo Mt., Beg Bunar place	42.188400	22.580480	1800	D.Chobanov		4,08	148
Poecilimon (Poecilimon) affinis affinis (Frivaldszky, 1868)	01.VII.2017	2017	Bulgaria	Osogovo Mt., Beg Bunar place	42.188400	22.580480	1800	D.Chobanov	hard to count after 60 teeth	4,27
Poecilimon (Poecilimon) affinis affinis (Frivaldszky, 1868)	01.VII.2017	2017	Bulgaria	Osogovo Mt., Beg Bunar place	42.188400	22.580480	1800	D.Chobanov		4,22	137
Poecilimon (Poecilimon) affinis affinis (Frivaldszky, 1868)	01.VII.2017	2017	Bulgaria	Osogovo Mt., Beg Bunar place	42.188400	22.580480	1800	D.Chobanov	hard to count after 80 teeth	3,94
Poecilimon (Poecilimon) affinis affinis (Frivaldszky, 1868)	01.VII.2017	2017	Bulgaria	Osogovo Mt., Beg Bunar place	42.188400	22.580480	1800	D.Chobanov		4,08	142
Poecilimon (Poecilimon) affinis affinis (Frivaldszky, 1868)	01.VII.2017	2017	Bulgaria	Rila Mt., Iliyna river				D.Chobanov		4,46	147
Poecilimon (Poecilimon) affinis affinis (Frivaldszky, 1868)	01.VII.2017	2017	Bulgaria	Rila Mt., Iliyna river				D.Chobanov		4,32	133
Poecilimon (Poecilimon) affinis affinis (Frivaldszky, 1868)	01.VII.2017	2017	Bulgaria	Rila Mt., Iliyna river				D.Chobanov		4,18	119
Poecilimon (Poecilimon) affinis affinis (Frivaldszky, 1868)	01.VII.2017	2017	Bulgaria	Rila Mt., Iliyna river				D.Chobanov		4,08	121
Poecilimon (Poecilimon) affinis affinis (Frivaldszky, 1868)	01.VII.2017	2017	Bulgaria	Rila Mt., Iliyna river				D.Chobanov		4,08	132
Poecilimon (Poecilimon) affinis affinis (Frivaldszky, 1868)	01.VII.2017	2017	Bulgaria	Rila Mt., Iliyna river				D.Chobanov		3,98	129
Poecilimon (Poecilimon) affinis affinis (Frivaldszky, 1868)	01.VII.2017	2017	Bulgaria	Rila Mt., Iliyna river				D.Chobanov		4,27	132
Poecilimon (Poecilimon) affinis affinis (Frivaldszky, 1868)	01.VII.2017	2017	Bulgaria	Rila Mt., Iliyna river				D.Chobanov		4,27	137
Poecilimon (Poecilimon) affinis affinis (Frivaldszky, 1868)	01.VII.2017	2017	Bulgaria	Rila Mt., Iliyna river				D.Chobanov		4,08	127
Poecilimon (Poecilimon) affinis hajlensis Karaman, 1974	08.VII.2017	2017	Montenegro	Hajla Mt.			1700	D.Chobanov		4,08	133
Poecilimon (Poecilimon) affinis dinaricus Ingrisch & Pavićević, 2010	06.VII.2017	2017	Montenegro	Durmitor Mts., Sušica river	43.177650	19.000000	1170	D.Chobanov		5,38	151
Poecilimon (Poecilimon) affinis hajlensis Karaman, 1974	08.VII.2017	2017	Montenegro	Hajla Mt.	42.802960	20.226380	1700	D.Chobanov		4,18	144
Poecilimon (Poecilimon) affinis hajlensis Karaman, 1974	08.VII.2017	2017	Montenegro	Hajla Mt.	42.802960	20.226380	1700	D.Chobanov		4,18	151
Poecilimon (Poecilimon) affinis hajlensis Karaman, 1974	08.VII.2017	2017	Montenegro	Hajla Mt.	42.802960	20.226380	1700	D.Chobanov		4,37	150
Poecilimon (Poecilimon) affinis hajlensis Karaman, 1974	08.VII.2017	2017	Montenegro	Hajla Mt.	42.802960	20.226380	1700	D.Chobanov		4,18	146
Poecilimon (Poecilimon) affinis hajlensis Karaman, 1974	08.VII.2017	2017	Montenegro	Hajla Mt.	42.802960	20.226380	1700	D.Chobanov		4,13	153
Poecilimon (Poecilimon) affinis hajlensis Karaman, 1974	08.VII.2017	2017	Montenegro	Hajla Mt.	42.802960	20.226380	1700	D.Chobanov		4,46	146
Poecilimon (Poecilimon) affinis komareki Cejchan, 1957	09.VII.2017	2017	Albania	Laç				D.Chobanov		5,82	195
Poecilimon (Poecilimon) affinis komareki Cejchan, 1957	09.VII.2017	2017	Albania	Laç				D.Chobanov		5,76	191
Poecilimon (Poecilimon) affinis komareki Cejchan, 1957	09.VII.2017	2017	Albania	Laç				D.Chobanov		5,88	184
Poecilimon (Poecilimon) affinis komareki Cejchan, 1957	07.VII.2017	2017	Montenegro	near Kolašin town				D.Chobanov		5,40	178
Poecilimon (Poecilimon) affinis komareki Cejchan, 1957	07.VII.2017	2017	Montenegro	near Kolašin town				D.Chobanov		5,34	158
Poecilimon (Poecilimon) affinis serbicus Karaman, 1974	13.VII.2017	2017	Macedonia	Šar Mt., near Ljuboten peak				D.Chobanov		4,08	142
Poecilimon (Poecilimon) affinis serbicus Karaman, 1974	13.VII.2017	2017	Macedonia	Šar Mt., near Ljuboten peak				D.Chobanov		4,32	145
Poecilimon (Poecilimon) affinis serbicus Karaman, 1974	13.VII.2017	2017	Macedonia	Šar Mt., near Ljuboten peak				D.Chobanov		3,89	156
Poecilimon (Poecilimon) affinis serbicus Karaman, 1974	13.VII.2017	2017	Macedonia	Šar Mt., near Ljuboten peak				D.Chobanov		4,13	141
Poecilimon (Poecilimon) affinis serbicus Karaman, 1974	13.VII.2017	2017	Macedonia	Šar Mt., near Ljuboten peak				D.Chobanov		4,32	145
Poecilimon (Poecilimon) affinis serbicus Karaman, 1974	13.VII.2017	2017	Macedonia	Šar Mt., near Ljuboten peak				D.Chobanov		4,18	139
Poecilimon (Poecilimon) affinis serbicus Karaman, 1974	13.VII.2017	2017	Macedonia	Šar Mt., near Ljuboten peak				D.Chobanov		3,84	140
Poecilimon (Poecilimon) affinis serbicus Karaman, 1974	13.VII.2017	2017	Macedonia	Šar Mt., near Ljuboten peak				D.Chobanov		4,37	150
Poecilimon (Poecilimon) affinis serbicus Karaman, 1974	13.VII.2017	2017	Macedonia	Šar Mt., near Ljuboten peak				D.Chobanov		4,03	142
Poecilimon (Poecilimon) affinis serbicus Karaman, 1974	13.VII.2017	2017	Macedonia	Šar Mt., near Ljuboten peak				D.Chobanov		4,32	149
Poecilimon (Poecilimon) affinis serbicus Karaman, 1974	13.VII.2017	2017	Macedonia	Šar Mt., near Ljuboten peak				D.Chobanov		4,37	141
Poecilimon (Poecilimon) affinis serbicus Karaman, 1974	13.VII.2017	2017	Macedonia	Šar Mt., near Ljuboten peak				D.Chobanov		3,84	136
Poecilimon (Poecilimon) artedentatus Heller, 1984	22.VI.2015	2015	Greece	Peloponnese peninsula, Koutsouroumpas village	37.734460	21.765110	700	D.Chobanov		4,80	168
Poecilimon (Poecilimon) hoelzeli Harz, 1966	18.VI.2018	2018	Macedonia	Nidzhe Mt., Nidzhe-Kopanki	40.990480	21.756600	1488	D.Chobanov		4,92	148
Poecilimon (Poecilimon) hoelzeli Harz, 1966	18.VI.2018	2018	Macedonia	Nidzhe Mt., Nidzhe-Kopanki	40.990480	21.756600	1488	D.Chobanov		5,34	135
Poecilimon (Poecilimon) hoelzeli Harz, 1966	18.VI.2018	2018	Macedonia	Nidzhe Mt., Nidzhe-Kopanki	40.990480	21.756600	1488	D.Chobanov		4,92	125
Poecilimon (Poecilimon) hoelzeli Harz, 1966	15.VI.2015	2015	Greece	Vermio Mt., Koustochori village	40.538540	22.114370	835	D.Chobanov		5,10	146
Poecilimon (Poecilimon) hoelzeli Harz, 1966	15.VI.2015	2015	Greece	Vermio Mt., Koustochori village	40.538540	22.114370	835	D.Chobanov		5,22	140
Poecilimon (Poecilimon) hoelzeli Harz, 1966	18.VI.2018	2018	Macedonia	Nidzhe Mt., Nidzhe-Kopanki	40.990480	21.756600	1488	D.Chobanov		4,86	141
Poecilimon (Poecilimon) hoelzeli Harz, 1966	06.VIII.2018	2018	Macedonia	Nidzhe Mt.	40.963333	21.799722	2000-2200	D.Chobanov		4,32	150
Poecilimon (Poecilimon) hoelzeli Harz, 1966	06.VIII.2018	2018	Macedonia	Nidzhe Mt.	40.963333	21.799722	2000-2200	D.Chobanov		4,14	141
Poecilimon (Poecilimon) jablanicensis Chobanov & Heller, 2010	31.VII.2018	2018	Macedonia	Jablanica Mt., 3 km W of Gorna Belica village	41.230200	20.519100	1900-2020	D.Chobanov		3,04	135
Poecilimon (Poecilimon) jablanicensis Chobanov & Heller, 2010	31.VII.2018	2018	Macedonia	Jablanica Mt., 3 km W of Gorna Belica village	41.230200	20.519100	1900-2020	D.Chobanov		3,04	127
Poecilimon (Poecilimon) jablanicensis Chobanov & Heller, 2010	31.VII.2018	2018	Macedonia	Jablanica Mt., 3 km W of Gorna Belica village	41.230200	20.519100	1900-2020	D.Chobanov		2,96	121
Poecilimon (Poecilimon) nobilis Brunner von Wattenwyl, 1878	18.V.2018	2018	Greece	Peloponnese peninsula, Nemea village				D.Chobanov	easy counting and visible along entire length	3,50	111
Poecilimon (Poecilimon) nobilis Brunner von Wattenwyl, 1878	04.VI.2017	2017	Greece	Peloponnese peninsula, Lalas village				D.Chobanov	easy counting and visible along entire length	3,60	99
Poecilimon (Poecilimon) nobilis Brunner von Wattenwyl, 1878	03.VI.2017	2017	Greece	near Paliovarka village	38.686111	21.009167	156	D.Chobanov	easy counting and visible along entire length	3,50	105
Poecilimon (Poecilimon) nobilis Brunner von Wattenwyl, 1878	20.VI.2015	2015	Greece	Peloponnese peninsula, Taygetos Mt., 3 km E of Karea village	37.009420	22.345640	1175-1750	D.Chobanov	easy counting and visible along entire length	3,36	106
Poecilimon (Poecilimon) nobilis Brunner von Wattenwyl, 1878	20.VI.2015	2015	Greece	Peloponnese peninsula, Taygetos Mt., 3 km E of Karea village	37.009420	22.345640	1175-1750	D.Chobanov	easy counting and visible along entire length	2,78	90
Poecilimon (Poecilimon) nobilis Brunner von Wattenwyl, 1878	20.VI.2015	2015	Greece	Peloponnese peninsula, Taygetos Mt., 3 km E of Karea village	37.009420	22.345640	1175-1750	D.Chobanov	easy counting and visible along entire length	2,93	107
Poecilimon (Poecilimon) nobilis Brunner von Wattenwyl, 1878	20.VI.2015	2015	Greece	Peloponnese peninsula, Taygetos Mt., 3 km E of Karea village	37.009420	22.345640	1175-1750	D.Chobanov	easy counting and visible along entire length	3,31	100
Poecilimon (Poecilimon) nobilis Brunner von Wattenwyl, 1878	19.VI.2015	2015	Greece	Peloponnese peninsula, Parnon Mt., Katafigio Parnonos village	37.225650	22.624800	1600	D.Chobanov	easy counting and visible along entire length	3,31	95
Poecilimon (Poecilimon) nobilis Brunner von Wattenwyl, 1878	21.VI.2015	2015	Greece	Peloponnese peninsula, S of Elea village	37.688480	21.813010	200	D.Chobanov	easy counting and visible along entire length	3,98	98
Poecilimon (Poecilimon) nobilis Brunner von Wattenwyl, 1878	21.VI.2015	2015	Greece	Peloponnese peninsula, S of Elea village	37.688480	21.813010	200	D.Chobanov	easy counting and visible along entire length	3,60	94
Poecilimon (Poecilimon) nobilis Brunner von Wattenwyl, 1878	17.VI.2015	2015	Greece	Peloponnese peninsula, Killini Mt., above Trikala	37.961350	22.411290	1535	D.Chobanov	easy counting and visible along entire length	3,31	99
Poecilimon (Poecilimon) nobilis Brunner von Wattenwyl, 1878	17.VI.2015	2015	Greece	Peloponnese peninsula, Killini Mt., above Trikala	37.961350	22.411290	1535	D.Chobanov	easy counting and visible along entire length	3,02	81
Poecilimon (Poecilimon) nobilis Brunner von Wattenwyl, 1878	17.VI.2015	2015	Greece	Peloponnese peninsula, Killini Mt., above Trikala	37.961350	22.411290	1535	D.Chobanov	easy counting and visible along entire length	2,88	82
Poecilimon (Poecilimon) nobilis Brunner von Wattenwyl, 1878	21.VI.2015	2015	Greece	Peloponnese peninsula, Killini Mt.				D.Chobanov	easy counting and visible along entire length	3,02	95
Poecilimon (Poecilimon) nobilis Brunner von Wattenwyl, 1878	19.VI.2015	2015	Greece	Peloponnese peninsula, Taygetos Mt., near Krioneri village	36.975990	22.380450	1175	D.Chobanov	easy counting and visible along entire length	3,12	91
Poecilimon (Poecilimon) nonveilleri Ingrisch & Pavićević, 2010	06.VII.2015	2017	Montenegro	Sušica canyon, S of Nedajno village	43.177650	19.000000	1170	D.Chobanov		3,84	119
Poecilimon (Poecilimon) nonveilleri Ingrisch & Pavićević, 2010	06.VII.2015	2017	Montenegro	Sušica canyon, S of Nedajno village	43.177650	19.000000	1170	D.Chobanov		3,89	116
Poecilimon (Poecilimon) nonveilleri Ingrisch & Pavićević, 2010	06.VII.2015	2017	Montenegro	Sušica canyon, S of Nedajno village	43.177650	19.000000	1170	D.Chobanov		4,13	105
Poecilimon (Poecilimon) nonveilleri Ingrisch & Pavićević, 2010	06.VII.2015	2017	Montenegro	Sušica canyon, S of Nedajno village	43.177650	19.000000	1170	D.Chobanov		3,84	113
Poecilimon (Poecilimon) nonveilleri Ingrisch & Pavićević, 2010	06.VII.2015	2017	Montenegro	Sušica canyon, S of Nedajno village	43.177650	19.000000	1170	D.Chobanov		3,74	112
Poecilimon (Poecilimon) nonveilleri Ingrisch & Pavićević, 2010	06.VII.2015	2017	Montenegro	Sušica canyon, S of Nedajno village	43.177650	19.000000	1170	D.Chobanov		4,32	109
Poecilimon (Poecilimon) nonveilleri Ingrisch & Pavićević, 2010	06.VII.2015	2017	Montenegro	Sušica canyon, S of Nedajno village	43.177650	19.000000	1170	D.Chobanov		3,98	111
Poecilimon (Poecilimon) nonveilleri Ingrisch & Pavićević, 2010	06.VII.2015	2017	Montenegro	Sušica canyon, S of Nedajno village	43.177650	19.000000	1170	D.Chobanov		3,89	112
Poecilimon (Poecilimon) nonveilleri Ingrisch & Pavićević, 2010	06.VII.2015	2017	Montenegro	Sušica canyon, S of Nedajno village	43.177650	19.000000	1170	D.Chobanov	left wing missing
Poecilimon (Poecilimon) nonveilleri Ingrisch & Pavićević, 2010	06.VII.2015	2017	Montenegro	Sušica canyon, S of Nedajno village	43.177650	19.000000	1170	D.Chobanov		4,13	104
Poecilimon (Poecilimon) obesus Brunner von Wattenwyl, 1878	31.V.2017	2017	Greece	1 km W of Perdika village	39.479722	20.868333	522	D.Chobanov	after 75 teeth, file dividе into double triples rows, not in a row	4,32	80
Poecilimon (Poecilimon) obesus Brunner von Wattenwyl, 1878	31.V.2017	2017	Greece	1 km W of Perdika village	39.479722	20.868333	522	D.Chobanov	after 75 teeth, file dividе into double triples rows, not in a row	4,32	87
Poecilimon (Poecilimon) obesus Brunner von Wattenwyl, 1878	31.V.2017	2017	Greece	1 km W of Perdika village	39.479722	20.868333	522	D.Chobanov		4,37	92
Poecilimon (Poecilimon) obesus Brunner von Wattenwyl, 1878	31.V.2017	2017	Greece	1 km W of Perdika village	39.479722	20.868333	522	D.Chobanov		4,27	85
Poecilimon (Poecilimon) obesus Brunner von Wattenwyl, 1878	31.V.2017	2017	Greece	1 km W of Perdika village	39.479722	20.868333	522	D.Chobanov		4,22	95
Poecilimon (Poecilimon) obesus Brunner von Wattenwyl, 1878	31.V.2017	2017	Greece	1 km W of Perdika village	39.479722	20.868333	522	D.Chobanov	after 75 teeth, file dividе into double triples rows, not in a row	4,32	89
Poecilimon (Poecilimon) obesus Brunner von Wattenwyl, 1878	31.V.2017	2017	Greece	1 km W of Perdika village	39.479722	20.868333	522	D.Chobanov	after 75 teeth,, file dividе into bunch of teeth (in row 110 teeth, in bunch 135)	4,42	110
Poecilimon (Poecilimon) obesus Brunner von Wattenwyl, 1878	31.V.2017	2017	Greece	1 km W of Perdika village	39.479722	20.868333	522	D.Chobanov		3,37	91
Poecilimon (Poecilimon) obesus Brunner von Wattenwyl, 1878	31.V.2017	2017	Greece	1 km W of Perdika village	39.479722	20.868333	522	D.Chobanov		4,60	90
Poecilimon (Poecilimon) obesus Brunner von Wattenwyl, 1878	31.V.2017	2017	Greece	1 km W of Perdika village	39.479722	20.868333	522	D.Chobanov		4,32	89
Poecilimon (Poecilimon) obesus Brunner von Wattenwyl, 1878	31.V.2017	2017	Greece	1 km W of Perdika village	39.479722	20.868333	522	D.Chobanov	after 86 teeth,, file dividе into bunch of teeth (in row 105 teeth, in bunch 128)	4,56	105
Poecilimon (Poecilimon) obesus Brunner von Wattenwyl, 1878	31.V.2017	2017	Greece	1 km W of Perdika village	39.479722	20.868333	522	D.Chobanov		4,22	93
Poecilimon (Poecilimon) ornatus (Schmidt, 1850)	18.VI.2018	2018	Macedonia	Mariovo region, S of Budimirci village	41.032180	21.749650	905	D.Chobanov		3,94	111
Poecilimon (Poecilimon) ornatus (Schmidt, 1850)	18.VI.2018	2018	Macedonia	Mariovo region, S of Budimirci village	41.032180	21.749650	905	D.Chobanov		3,89	122
Poecilimon (Poecilimon) ornatus (Schmidt, 1850)	25.VI.2015	2015	Greece	Valtou Mt., 3 km SW of Avlaki village	39.126240	21.355170	1550-1750	D.Chobanov		4,60	125
Poecilimon (Poecilimon) ornatus (Schmidt, 1850)	25.VI.2015	2015	Greece	Valtou Mt., 3 km SW of Avlaki village	39.126240	21.355170	1550-1750	D.Chobanov		4,60	128
Poecilimon (Poecilimon) ornatus (Schmidt, 1850)	29.VI.2015	2015	Albania	Ostrovica Mt.			1500-2000	D.Chobanov		3,74	105
Poecilimon (Poecilimon) ornatus (Schmidt, 1850)	29.VI.2015	2015	Albania	Ostrovica Mt.			1500-2000	D.Chobanov		3,89	118
Poecilimon (Poecilimon) ornatus (Schmidt, 1850)	29.VI.2015	2015	Albania	Ostrovica Mt.			1500-2000	D.Chobanov		4,18	113
Poecilimon (Poecilimon) ornatus (Schmidt, 1850)	29.VI.2015	2015	Albania	Ostrovica Mt.			1500-2000	D.Chobanov		3,84	116
Poecilimon (Poecilimon) ornatus (Schmidt, 1850)	29.VI.2015	2015	Albania	Ostrovica Mt.			1500-2000	D.Chobanov		4,22	115
Poecilimon (Poecilimon) ornatus (Schmidt, 1850)	03.VII.2015	2015	Albania	Tomorri Mt., 3 km SW of Ujanik village	40.616180	20.185780	1865	D.Chobanov		3,94	113
Poecilimon (Poecilimon) pseudornatus Ingrisch & Pavićević, 2010	31.VII.2018	2018	Macedonia	Jablanica Mt., 1 km W of Gorna Belica village	41.219800	20.541800	1716	D.Chobanov		4,22	145
Poecilimon (Poecilimon) pseudornatus Ingrisch & Pavićević, 2010	24.VIII.2018	2018	Macedonia	Shar Mt., Borislovec			2000-2200	D.Chobanov		4,75	141
Poecilimon (Poecilimon) pseudornatus Ingrisch & Pavićević, 2010	24.VIII.2018	2018	Macedonia	Shar Mt., Borislovec			2000-2200	D.Chobanov		4,75	140
Poecilimon (Poecilimon) pseudornatus Ingrisch & Pavićević, 2010	24.VIII.2018	2018	Macedonia	Shar Mt., Borislovec			2000-2200	D.Chobanov		4,42	125
Poecilimon (Poecilimon) pseudornatus Ingrisch & Pavićević, 2010	08.VII.2017	2017	Montenegro	Tresnjevik pass				D.Chobanov		4,60	131
Poecilimon (Poecilimon) pseudornatus Ingrisch & Pavićević, 2010	08.VII.2017	2017	Montenegro	Tresnjevik pass				D.Chobanov		4,75	139
Poecilimon (Poecilimon) pseudornatus Ingrisch & Pavićević, 2010	08.VII.2017	2017	Montenegro	Tresnjevik pass				D.Chobanov		4,66	131
Poecilimon (Poecilimon) pseudornatus Ingrisch & Pavićević, 2010	08.VII.2017	2017	Montenegro	Tresnjevik pass				D.Chobanov		4,60	141
Poecilimon (Poecilimon) pseudornatus Ingrisch & Pavićević, 2010	08.VII.2017	2017	Montenegro	Tresnjevik pass				D.Chobanov		4,70	134
Poecilimon (Poecilimon) pseudornatus Ingrisch & Pavićević, 2010	31.VII.2018	2018	Macedonia	Jablanica Mt., 1 km W of Gorna Belica village	41.219800	20.541800	1716	D.Chobanov		4,75	143
Poecilimon (Poecilimon) pseudornatus Ingrisch & Pavićević, 2010	31.VII.2018	2018	Macedonia	Jablanica Mt., 1 km W of Gorna Belica village	41.219800	20.541800	1716	D.Chobanov		4,66	136
Poecilimon (Poecilimon) pseudornatus Ingrisch & Pavićević, 2010	31.VII.2018	2018	Macedonia	Jablanica Mt., 1 km W of Gorna Belica village	41.219800	20.541800	1716	D.Chobanov		4,80	147
Poecilimon (Poecilimon) pseudornatus Ingrisch & Pavićević, 2010	31.VII.2018	2018	Macedonia	Jablanica Mt., 1 km W of Gorna Belica village	41.219800	20.541800	1716	D.Chobanov		4,46	138
Poecilimon (Poecilimon) pseudornatus Ingrisch & Pavićević, 2010	06.VII.2017	2017	Montenegro	Durmitor Mt., Boricje				D.Chobanov		4,60	142
Poecilimon (Poecilimon) pseudornatus Ingrisch & Pavićević, 2010	06.VII.2017	2017	Montenegro	Durmitor Mt., Boricje				D.Chobanov		4,80	143
Poecilimon (Poecilimon) pseudornatus Ingrisch & Pavićević, 2010	06.VII.2017	2017	Montenegro	Durmitor Mt., Boricje				D.Chobanov		4,60	137
Poecilimon (Poecilimon) pseudornatus Ingrisch & Pavićević, 2010	06.VII.2017	2017	Montenegro	Durmitor Mt., Boricje				D.Chobanov		4,75	130
Poecilimon (Poecilimon) pseudornatus Ingrisch & Pavićević, 2010	06.VII.2017	2017	Montenegro	Durmitor Mt., Boricje				D.Chobanov		4,70	139
Poecilimon (Poecilimon) pseudornatus Ingrisch & Pavićević, 2010	06.VII.2017	2017	Montenegro	Durmitor Mt., Boricje				D.Chobanov		4,80	144
Poecilimon (Poecilimon) pseudornatus Ingrisch & Pavićević, 2010	08.VII.2017	2017	Montenegro	Prokletije Mt., 2 km E of Vusanje town	42.519300	19.865260	1230	D.Chobanov		4,90	142
Poecilimon (Poecilimon) pseudornatus Ingrisch & Pavićević, 2010	08.VII.2017	2017	Montenegro	Prokletije Mt., 2 km E of Vusanje town	42.519300	19.865260	1230	D.Chobanov		4,80	145
Poecilimon (Poecilimon) pseudornatus Ingrisch & Pavićević, 2010	08.VII.2017	2017	Montenegro	Prokletije Mt., 2 km E of Vusanje town	42.519300	19.865260	1230	D.Chobanov		4,75	138
Poecilimon (Poecilimon) pseudornatus Ingrisch & Pavićević, 2010	08.VII.2017	2017	Montenegro	Prokletije Mt., 2 km E of Vusanje town	42.519300	19.865260	1230	D.Chobanov		4,75	133
Poecilimon (Poecilimon) pseudornatus Ingrisch & Pavićević, 2010	08.VII.2017	2017	Montenegro	Prokletije Mt., 2 km E of Vusanje town	42.519300	19.865260	1230	D.Chobanov		4,66	138
Poecilimon (Poecilimon) pseudornatus Ingrisch & Pavićević, 2010	08.VII.2017	2017	Montenegro	Prokletije Mt., 2 km E of Vusanje town	42.519300	19.865260	1230	D.Chobanov		4,80	140
Poecilimon (Poecilimon) pseudornatus Ingrisch & Pavićević, 2010	08.VII.2017	2017	Montenegro	Prokletije Mt., 2 km E of Vusanje town	42.519300	19.865260	1230	D.Chobanov		4,60	136
Poecilimon (Poecilimon) pseudornatus Ingrisch & Pavićević, 2010	08.VII.2017	2017	Montenegro	Prokletije Mt., 2 km E of Vusanje town	42.519300	19.865260	1230	D.Chobanov		4,56	139
Poecilimon (Poecilimon) pseudornatus Ingrisch & Pavićević, 2010	08.VII.2017	2017	Montenegro	Prokletije Mt., 2 km E of Vusanje town	42.519300	19.865260	1230	D.Chobanov		4,66	141
Poecilimon (Poecilimon) pseudornatus Ingrisch & Pavićević, 2010	15.VII.2018	2018	Macedonia	Shar Mt., near Cerovo village				S.Hristovski?		4,22	139
Poecilimon (Poecilimon) soulion Willemse, 1987	04.VII.2015	2015	Albania	Trebeshina Mt., 2,5 km SW of Podgoran village	40.343560	20.103800	1600-1900	D.Chobanov		3,17	103
Poecilimon (Poecilimon) soulion Willemse, 1987	04.VII.2015	2015	Albania	Trebeshina Mt., 2,5 km SW of Podgoran village	40.343560	20.103800	1600-1900	D.Chobanov		2,98	101
Poecilimon (Poecilimon) soulion Willemse, 1987	04.VII.2015	2015	Albania	Trebeshina Mt., 2,5 km SW of Podgoran village	40.343560	20.103800	1600-1900	D.Chobanov		3,12	97
Poecilimon (Poecilimon) soulion Willemse, 1987	04.VII.2015	2015	Albania	Trebeshina Mt., 2,5 km SW of Podgoran village	40.343560	20.103800	1600-1900	D.Chobanov		2,98	98
Poecilimon (Poecilimon) soulion Willemse, 1987	04.VII.2015	2015	Albania	Trebeshina Mt., 2,5 km SW of Podgoran village	40.343560	20.103800	1600-1900	D.Chobanov		2,88	98
Poecilimon (Poecilimon) soulion Willemse, 1987	04.VII.2015	2015	Albania	Trebeshina Mt., 2,5 km SW of Podgoran village	40.343560	20.103800	1600-1900	D.Chobanov		2,74	97
Poecilimon (Poecilimon) soulion Willemse, 1987	04.VII.2015	2015	Albania	Trebeshina Mt., 2,5 km SW of Podgoran village	40.343560	20.103800	1600-1900	D.Chobanov		3,02	100
Poecilimon (Poecilimon) soulion Willemse, 1987	04.VII.2015	2015	Albania	Trebeshina Mt., 2,5 km SW of Podgoran village	40.343560	20.103800	1600-1900	D.Chobanov		3,02	99
